# Supplementary material for: Different diversity-dependent declines in speciation rate unbalances species richness in terrestrial slugs
Source: PubMed Central journal article supplement (PMC5700933; doi:10.1038/s41598-017-16417-y), 2017-11-23

**Different diversity-dependent declines in speciation rate unbalances  
species richness in terrestrial slugs**

REGINA L. CUNHA, CLÁUDIA PATRÃO AND RITA CASTILHO

*CCMAR (Centre of Marine Sciences) - Campus de Gambelas, Universidade do Algarve,  
8005-139 Faro, Portugal.*

**Supplementary Table S1.** SpedeSTEM results for single and multiple AIC calculations. The best model that supported an eight-species scenario within endemic *Geomalacus* is shown in bold.

Single AIC calculation

| K         | -ln             | AIC             | delta    | model Likelihood | wi       |
|-----------|-----------------|-----------------|----------|------------------|----------|
| 1         | 16360.42        | 32722.85        | 9406.5   | 0                | 0        |
| 2         | 14092.81        | 28189.62        | 4873.34  | 0                | 0        |
| 3         | 13030.82        | 26067.64        | 2751.36  | 0                | 0        |
| 4         | 12185.57        | 24379.13        | 1062.85  | 0                | 0        |
| 5         | 11892.34        | 23794.68        | 478.4    | 0                | 0        |
| 6         | 11784.61        | 23581.23        | 264.94   | 0                | 0        |
| 7         | 11676.85        | 23367.69        | 51.41    | 6.8E-12          | 6.8E-12  |
| 8         | 11661.34        | 23338.68        | 22.4     | 1.4E-05          | 1.4E-05  |
| <b>9*</b> | <b>11694.14</b> | <b>23316.28</b> | <b>0</b> | <b>1</b>         | <b>1</b> |

Multiple AIC calculations

| K         | -ln             | AIC             | delta    | model Likelihood | wi       |
|-----------|-----------------|-----------------|----------|------------------|----------|
| 1         | 16360.42        | 32722.85        | 9406.5   | 0                | 0        |
| 2         | 14092.81        | 28189.62        | 4873.34  | 0                | 0        |
| 3         | 13030.82        | 26067.64        | 2751.36  | 0                | 0        |
| 4         | 12185.57        | 24379.13        | 1062.85  | 0                | 0        |
| 5         | 11892.34        | 23794.68        | 478.4    | 0                | 0        |
| 6         | 11784.61        | 23581.23        | 264.94   | 0                | 0        |
| 7         | 11676.85        | 23367.69        | 51.41    | 6.8E-12          | 6.8E-12  |
| 8         | 11661.34        | 23338.68        | 22.4     | 1.4E-05          | 1.4E-05  |
| <b>9*</b> | <b>11694.14</b> | <b>23316.28</b> | <b>0</b> | <b>1</b>         | <b>1</b> |

\* outgroup included

K = n° species

ln = likelihood of the species tree

wi = model probabilities, which measure the proportion of the total model likelihood (i.e., across all models) represented by that particular model (Carstens & Dewey, 2010)

Carstens BC, Dewey TA (2010) Species delimitation using a combined coalescent and information-theoretic approach: an example from North American *Myotis* bats. *Syst Biol* 59, 400-414.

Supplementary Table S2. Results for diversity-dependent diversification decoupled model (DDD) for *Geomalacus* (all species) and *Arion* total species = 40.

| Package | Function | IST | Model                                                             | <i>Arion</i> |         |         | <i>Geomalacus</i> |         |         | AIC    | Δ AIC |
|---------|----------|-----|-------------------------------------------------------------------|--------------|---------|---------|-------------------|---------|---------|--------|-------|
|         |          |     |                                                                   | $r_0$        | $\mu_0$ | $K$     | $r_0$             | $\mu_0$ | $K$     |        |       |
| DDD     | dd_KI_ML | yes | $r_0A, r_0G, \mu_0A, \mu_0G, KA, KG$                              | 0,653        | 0,0459  | 51,79   | 0,781             | 0,0000  | 8,00    | 126,12 | 5,01  |
| DDD     | dd_KI_ML | yes | $r_0A, r_0G, KA, KG$                                              | 0,580        | ‡       | 52,50   | 0,779             | ‡       | 8,00    | 122,58 | 1,46  |
| DDD     | dd_KI_ML | yes | $r_0A \approx r_0G, KA, KG$                                       | 0,588        | ‡       | 52,25   | 0,588             | ‡       | 8,00    | 121,12 | 0,00  |
| DDD     | dd_KI_ML | yes | $r_0A, r_0G, KA \approx KG$                                       | 0,321        | ‡       | 2995,36 | 10,000            | ‡       | 2995,36 | 210,66 | 89,55 |
| DDD     | dd_KI_ML | yes | $r_0A, r_0G, KA \approx \text{Inf}, KG \approx \text{Inf}$        | 0,227        | ‡       | Inf     | 4,804             | ‡       | Inf     | 155,57 | 34,46 |
| DDD     | dd_KI_ML | yes | $r_0A \approx r_0G, KA \approx \text{Inf}, KG \approx \text{Inf}$ | 0,214        | ‡       | Inf     | 0,214             | ‡       | Inf     | 141,55 | 20,44 |

A, refers to *Arion*; G refers to *Geomalacus*; IST, incomplete sampling taxa;  $\mu_0$ , the initial extinction rate when applicable;  $K$ , carrying capacity parameter;  $r_0$  ( $= \lambda_0 - \mu_0$ ), initial net diversification rate; AIC, Akaike information criterion; ΔAIC, the difference in Akaike information criterion score from the best-fit model (shaded grey). ‡, extinction fixed to zero; Inf, infinity.

**Supplementary Table S3.** Collection ID, species name, accession number, haplotype number, number of sequences of cytochrome oxidase subunit I (COI), location code, region, latitude and longitude for *Geomalacus* specimens. List of Iberian endemic *Arion* species and GenBank accession numbers of available COI sequences.

| Collection ID | Species               | COI Genbank       |                  | Number of sequences | Location Code | Region    | Latitude | Longitude |
|---------------|-----------------------|-------------------|------------------|---------------------|---------------|-----------|----------|-----------|
|               |                       | Accession Numbers | Haplotype number |                     |               |           |          |           |
| ANGMOa0147    | <i>G. anguiformis</i> | KF781852          | 1                |                     | MOa           | Monchique | 37.307   | -8.570    |
| ANGMOa0319    | <i>G. anguiformis</i> | KF781853          | 1                |                     | MOa           | Monchique | 37.307   | -8.570    |
| ANGMOa0321    | <i>G. anguiformis</i> | KF781854          | 1                |                     | MOa           | Monchique | 37.307   | -8.570    |
| ANGMOa0329    | <i>G. anguiformis</i> | KF781855          | 1                |                     | MOa           | Monchique | 37.307   | -8.570    |
| ANGMOa0316    | <i>G. anguiformis</i> | KF781856          | 1                |                     | MOa           | Monchique | 37.307   | -8.570    |
| ANGMOa0326    | <i>G. anguiformis</i> | KF781857          | 1                |                     | MOa           | Monchique | 37.307   | -8.570    |
| ANGMOa0327    | <i>G. anguiformis</i> | KF781858          | 1                |                     | MOa           | Monchique | 37.307   | -8.570    |
| ANGMOa0330    | <i>G. anguiformis</i> | KF781859          | 1                |                     | MOa           | Monchique | 37.307   | -8.570    |
| ANGMOa0322    | <i>G. anguiformis</i> | KF781860          | 1                | 17                  | MOa           | Monchique | 37.307   | -8.570    |
| ANGMOa0323    | <i>G. anguiformis</i> | KF781861          | 1                |                     | MOa           | Monchique | 37.307   | -8.570    |
| ANGMOa0324    | <i>G. anguiformis</i> | KF781862          | 1                |                     | MOa           | Monchique | 37.307   | -8.570    |
| ANGMOa0328    | <i>G. anguiformis</i> | KF781863          | 1                |                     | MOa           | Monchique | 37.307   | -8.570    |
| ANGMOa0318    | <i>G. anguiformis</i> | KF781864          | 1                |                     | MOa           | Monchique | 37.307   | -8.570    |
| ANGMOa0320    | <i>G. anguiformis</i> | KF781865          | 1                |                     | MOa           | Monchique | 37.307   | -8.570    |
| ANGMOa0317    | <i>G. anguiformis</i> | KF781866          | 1                |                     | MOa           | Monchique | 37.307   | -8.570    |
| ANGMOb0260    | <i>G. anguiformis</i> | KF781872          | 1                |                     | MOb           | Monchique | 37.305   | -8.588    |
| ANGMOb0254    | <i>G. anguiformis</i> | KF781877          | 1                |                     | MOb           | Monchique | 37.305   | -8.588    |
| ANGMOb0261    | <i>G. anguiformis</i> | KF781867          | 2                |                     | MOb           | Monchique | 37.305   | -8.588    |
| ANGMOb0266    | <i>G. anguiformis</i> | KF781871          | 2                | 3                   | MOb           | Monchique | 37.305   | -8.588    |
| ANGMOb0262    | <i>G. anguiformis</i> | KF781878          | 2                |                     | MOb           | Monchique | 37.305   | -8.588    |
| ANGMOb0264    | <i>G. anguiformis</i> | KF781868          | 3                |                     | MOb           | Monchique | 37.305   | -8.588    |
| ANGMOb0257    | <i>G. anguiformis</i> | KF781869          | 3                |                     | MOb           | Monchique | 37.305   | -8.588    |
| ANGMOb0263    | <i>G. anguiformis</i> | KF781870          | 3                |                     | MOb           | Monchique | 37.305   | -8.588    |
| ANGMOb0268    | <i>G. anguiformis</i> | KF781873          | 3                |                     | MOb           | Monchique | 37.305   | -8.588    |
| ANGMOb0265    | <i>G. anguiformis</i> | KF781874          | 3                |                     | MOb           | Monchique | 37.305   | -8.588    |
| ANGMOb0267    | <i>G. anguiformis</i> | KF781875          | 3                |                     | MOb           | Monchique | 37.305   | -8.588    |
| ANGMOc0331    | <i>G. anguiformis</i> | KF781879          | 3                |                     | MOc           | Monchique | 37.320   | -8.536    |
| ANGMOc0333    | <i>G. anguiformis</i> | KF781880          | 3                |                     | MOc           | Monchique | 37.320   | -8.536    |
| ANGMOc0332    | <i>G. anguiformis</i> | KF781881          | 3                |                     | MOc           | Monchique | 37.320   | -8.536    |
| ANGMOc0334    | <i>G. anguiformis</i> | KF781883          | 3                |                     | MOc           | Monchique | 37.320   | -8.536    |
| ANGMOd0337    | <i>G. anguiformis</i> | KF781885          | 3                |                     | MOd           | Monchique | 37.342   | -8.488    |
| ANGMOd0338    | <i>G. anguiformis</i> | KF781886          | 3                |                     | MOd           | Monchique | 37.342   | -8.488    |
| ANGMOd1718    | <i>G. anguiformis</i> | KF781887          | 3                |                     | MOd           | Monchique | 37.342   | -8.488    |
| ANGMOd0341    | <i>G. anguiformis</i> | KF781889          | 3                | 28                  | MOd           | Monchique | 37.342   | -8.488    |
| ANGMOd0336    | <i>G. anguiformis</i> | KF781890          | 3                |                     | MOd           | Monchique | 37.342   | -8.488    |
| ANGMOd0417    | <i>G. anguiformis</i> | KF781891          | 3                |                     | MOd           | Monchique | 37.342   | -8.488    |
| ANGMOd0339    | <i>G. anguiformis</i> | KF781892          | 3                |                     | MOd           | Monchique | 37.342   | -8.488    |
| ANGMOe0532    | <i>G. anguiformis</i> | KF781893          | 3                |                     | MOe           | Monchique | 37.313   | -8.549    |
| ANGMOe0531    | <i>G. anguiformis</i> | KF781895          | 3                |                     | MOe           | Monchique | 37.313   | -8.549    |
| ANGMOe0533    | <i>G. anguiformis</i> | KF781896          | 3                |                     | MOe           | Monchique | 37.313   | -8.549    |
| ANGMOe1147    | <i>G. anguiformis</i> | KF781897          | 3                |                     | MOe           | Monchique | 37.313   | -8.549    |
| ANGMOe1149    | <i>G. anguiformis</i> | KF781898          | 3                |                     | MOe           | Monchique | 37.313   | -8.549    |
| ANGMOe0607    | <i>G. anguiformis</i> | KF781899          | 3                |                     | MOe           | Monchique | 37.313   | -8.549    |
| ANGMOe0530    | <i>G. anguiformis</i> | KF781900          | 3                |                     | MOe           | Monchique | 37.313   | -8.549    |
| ANGMOe0526    | <i>G. anguiformis</i> | KF781903          | 3                |                     | MOe           | Monchique | 37.313   | -8.549    |
| ANGMOe0608    | <i>G. anguiformis</i> | KF781904          | 3                |                     | MOe           | Monchique | 37.313   | -8.549    |
| ANGMOe0528    | <i>G. anguiformis</i> | KF781905          | 3                |                     | MOe           | Monchique | 37.313   | -8.549    |
| ANGMOe0534    | <i>G. anguiformis</i> | KF781906          | 3                |                     | MOe           | Monchique | 37.313   | -8.549    |
| ANGMOb0256    | <i>G. anguiformis</i> | KF781876          | 4                | 1                   | MOb           | Monchique | 37.305   | -8.588    |
| ANGMOc0335    | <i>G. anguiformis</i> | KF781882          | 5                | 1                   | MOc           | Monchique | 37.320   | -8.536    |
| ANGMOd0340    | <i>G. anguiformis</i> | KF781884          | 6                | 1                   | MOd           | Monchique | 37.342   | -8.488    |
| ANGMOd0418    | <i>G. anguiformis</i> | KF781888          | 7                | 2                   | MOd           | Monchique | 37.342   | -8.488    |
| ANGMOf0556    | <i>G. anguiformis</i> | KF781915          | 7                |                     | MOf           | Monchique | 37.306   | -8.499    |
| ANGMOe0529    | <i>G. anguiformis</i> | KF781894          | 8                | 1                   | MOe           | Monchique | 37.313   | -8.549    |
| ANGMOe0527    | <i>G. anguiformis</i> | KF781901          | 9                | 1                   | MOe           | Monchique | 37.313   | -8.549    |
| ANGMOe0505    | <i>G. anguiformis</i> | KF781902          | 10               | 1                   | MOe           | Monchique | 37.313   | -8.549    |
| ANGMOf0560    | <i>G. anguiformis</i> | KF781907          | 11               |                     | MOf           | Monchique | 37.306   | -8.499    |
| ANGMOf0561    | <i>G. anguiformis</i> | KF781912          | 11               | 2                   | MOf           | Monchique | 37.306   | -8.499    |
| ANGMOf0552    | <i>G. anguiformis</i> | KF781908          | 12               |                     | MOf           | Monchique | 37.306   | -8.499    |
| ANGMOf0551    | <i>G. anguiformis</i> | KF781911          | 12               |                     | MOf           | Monchique | 37.306   | -8.499    |
| ANGMOf0550    | <i>G. anguiformis</i> | KF781917          | 12               | 5                   | MOf           | Monchique | 37.306   | -8.499    |
| ANGMOf0558    | <i>G. anguiformis</i> | KF781918          | 12               |                     | MOf           | Monchique | 37.306   | -8.499    |
| ANGMOf0553    | <i>G. anguiformis</i> | KF781919          | 12               |                     | MOf           | Monchique | 37.306   | -8.499    |
| ANGMOf0548    | <i>G. anguiformis</i> | KF781909          | 13               |                     | MOf           | Monchique | 37.306   | -8.499    |
| ANGMOf0559    | <i>G. anguiformis</i> | KF781910          | 13               | 2                   | MOf           | Monchique | 37.306   | -8.499    |
| ANGMOf0554    | <i>G. anguiformis</i> | KF781913          | 14               |                     | MOf           | Monchique | 37.306   | -8.499    |
| ANGMOf0555    | <i>G. anguiformis</i> | KF781916          | 14               | 2                   | MOf           | Monchique | 37.306   | -8.499    |
| ANGMOf0549    | <i>G. anguiformis</i> | KF781914          | 15               |                     | MOf           | Monchique | 37.306   | -8.499    |
| ANGMOf0557    | <i>G. anguiformis</i> | KF781920          | 15               | 2                   | MOf           | Monchique | 37.306   | -8.499    |
| ANGSbb1162    | <i>G. anguiformis</i> | KF781921          | 16               |                     | Sbb           | Faro      | 37.273   | -7.875    |
| ANGSbb1863    | <i>G. anguiformis</i> | KF781922          | 16               |                     | Sbb           | Faro      | 37.273   | -7.875    |
| ANGSbb1174    | <i>G. anguiformis</i> | KF781923          | 16               |                     | Sbb           | Faro      | 37.273   | -7.875    |
| ANGSbb1864    | <i>G. anguiformis</i> | KF781924          | 16               |                     | Sbb           | Faro      | 37.273   | -7.875    |
| ANGSbb1171    | <i>G. anguiformis</i> | KF781925          | 16               |                     | Sbb           | Faro      | 37.273   | -7.875    |
| ANGSbb1170    | <i>G. anguiformis</i> | KF781926          | 16               |                     | Sbb           | Faro      | 37.273   | -7.875    |

| Collection ID | Species               | COI Genebank<br>Accession<br>Numbers | Haplotype<br>number | Number of<br>sequences | Location<br>Code | Region           | Latitude | Longitude |
|---------------|-----------------------|--------------------------------------|---------------------|------------------------|------------------|------------------|----------|-----------|
| ANGSBb1158    | <i>G. anguiformis</i> | KF781927                             | 16                  |                        | SBb              | Faro             | 37.273   | -7.875    |
| ANGSBb1867    | <i>G. anguiformis</i> | KF781928                             | 16                  | 16                     | SBb              | Faro             | 37.273   | -7.875    |
| ANGSBb1175    | <i>G. anguiformis</i> | KF781929                             | 16                  |                        | SBb              | Faro             | 37.273   | -7.875    |
| ANGSBb1154    | <i>G. anguiformis</i> | KF781932                             | 16                  |                        | SBb              | Faro             | 37.273   | -7.875    |
| ANGSBb1160    | <i>G. anguiformis</i> | KF781934                             | 16                  |                        | SBb              | Faro             | 37.273   | -7.875    |
| ANGSBb1155    | <i>G. anguiformis</i> | KF781935                             | 16                  |                        | SBb              | Faro             | 37.273   | -7.875    |
| ANGSBb1163    | <i>G. anguiformis</i> | KF781936                             | 16                  |                        | SBb              | Faro             | 37.273   | -7.875    |
| ANGSBb1159    | <i>G. anguiformis</i> | KF781939                             | 16                  |                        | SBb              | Faro             | 37.273   | -7.875    |
| ANGSBb1176    | <i>G. anguiformis</i> | KF781940                             | 16                  |                        | SBb              | Faro             | 37.273   | -7.875    |
| ANGSBb1865    | <i>G. anguiformis</i> | KF781941                             | 16                  |                        | SBb              | Faro             | 37.273   | -7.875    |
| ANGSBb1153    | <i>G. anguiformis</i> | KF781930                             | 17                  |                        | SBb              | Faro             | 37.273   | -7.875    |
| ANGSBb1169    | <i>G. anguiformis</i> | KF781933                             | 17                  | 3                      | SBb              | Faro             | 37.273   | -7.875    |
| ANGSBb1866    | <i>G. anguiformis</i> | KF781938                             | 17                  |                        | SBb              | Faro             | 37.273   | -7.875    |
| ANGSBb1161    | <i>G. anguiformis</i> | KF781931                             | 18                  | 2                      | SBb              | Faro             | 37.273   | -7.875    |
| ANGSBb1172    | <i>G. anguiformis</i> | KF781937                             | 18                  |                        | SBb              | Faro             | 37.273   | -7.875    |
| ARAARA0525    | <i>G. anguiformis</i> | KF781942                             | 19                  |                        | ARA              | Aracena          | 37.878   | -6.817    |
| ARAARA0536    | <i>G. anguiformis</i> | KF781944                             | 19                  |                        | ARA              | Aracena          | 37.878   | -6.817    |
| ARAARA0538    | <i>G. anguiformis</i> | KF781946                             | 19                  |                        | ARA              | Aracena          | 37.878   | -6.817    |
| ARAARA0540    | <i>G. anguiformis</i> | KF781948                             | 19                  |                        | ARA              | Aracena          | 37.878   | -6.817    |
| ARAARA0542    | <i>G. anguiformis</i> | KF781950                             | 19                  | 9                      | ARA              | Aracena          | 37.878   | -6.817    |
| ARAARA0543    | <i>G. anguiformis</i> | KF781951                             | 19                  |                        | ARA              | Aracena          | 37.878   | -6.817    |
| ARAARA0544    | <i>G. anguiformis</i> | KF781952                             | 19                  |                        | ARA              | Aracena          | 37.878   | -6.817    |
| ARAARA0545    | <i>G. anguiformis</i> | KF781953                             | 19                  |                        | ARA              | Aracena          | 37.878   | -6.817    |
| ARAARA0546    | <i>G. anguiformis</i> | KF781954                             | 19                  |                        | ARA              | Aracena          | 37.878   | -6.817    |
| ARAARA0535    | <i>G. anguiformis</i> | KF781943                             | 20                  |                        | ARA              | Aracena          | 37.878   | -6.817    |
| ARAARA0537    | <i>G. anguiformis</i> | KF781945                             | 20                  | 3                      | ARA              | Aracena          | 37.878   | -6.817    |
| ARAARA0541    | <i>G. anguiformis</i> | KF781949                             | 20                  |                        | ARA              | Aracena          | 37.878   | -6.817    |
| ARAARA0539    | <i>G. anguiformis</i> | KF781947                             | 21                  | 1                      | ARA              | Aracena          | 37.878   | -6.817    |
| ARAARA0547    | <i>G. anguiformis</i> | KF781955                             | 22                  | 1                      | ARA              | Aracena          | 37.878   | -6.817    |
| LETTAa1851    | <i>L. numidica</i>    | KF806037                             | 23                  |                        | TAa              | Morocco          | 35.784   | -5.901    |
| LETTAa1860    | <i>L. numidica</i>    | KF806046                             | 23                  |                        | TAa              | Morocco          | 35.784   | -5.901    |
| LETTAa1857    | <i>L. numidica</i>    | KF806048                             | 23                  | 5                      | TAa              | Morocco          | 35.784   | -5.901    |
| LETTAb1889    | <i>L. numidica</i>    | KF806049                             | 23                  |                        | TAb              | Morocco          | 35.783   | -5.851    |
| LETTAb1890    | <i>L. numidica</i>    | KF806050                             | 23                  |                        | TAb              | Morocco          | 35.783   | -5.851    |
| LETTAa1855    | <i>L. numidica</i>    | KF806038                             | 24                  | 1                      | TAa              | Morocco          | 35.784   | -5.901    |
| LETTAa1850    | <i>L. numidica</i>    | KF806039                             | 25                  | 1                      | TAa              | Morocco          | 35.784   | -5.901    |
| LETTAa1849    | <i>L. numidica</i>    | KF806040                             | 26                  |                        | TAa              | Morocco          | 35.784   | -5.901    |
| LETTAa1848    | <i>L. numidica</i>    | KF806043                             | 26                  | 2                      | TAa              | Morocco          | 35.784   | -5.901    |
| LETTAa1856    | <i>L. numidica</i>    | KF806041                             | 27                  |                        | TAa              | Morocco          | 35.784   | -5.901    |
| LETTAa1854    | <i>L. numidica</i>    | KF806042                             | 27                  |                        | TAa              | Morocco          | 35.784   | -5.901    |
| LETTAa1853    | <i>L. numidica</i>    | KF806044                             | 27                  | 4                      | TAa              | Morocco          | 35.784   | -5.901    |
| LETTAa1847    | <i>L. numidica</i>    | KF806047                             | 27                  |                        | TAa              | Morocco          | 35.784   | -5.901    |
| LETTAa1852    | <i>L. numidica</i>    | KF806045                             | 28                  | 1                      | TAa              | Morocco          | 35.784   | -5.901    |
| LETLET0605    | <i>L. numidica</i>    |                                      | 29                  | 1                      | LET              | Morocco          | 31.130   | -7.900    |
| LETLET0622    | <i>L. numidica</i>    |                                      | 30                  | 1                      | LET              | Morocco          | 31.130   | -7.900    |
| LETLET0630    | <i>L. numidica</i>    |                                      | 31                  | 2                      | LET              | Morocco          | 31.130   | -7.900    |
| LETLET0636    | <i>L. numidica</i>    |                                      | 31                  |                        | LET              | Morocco          | 31.130   | -7.900    |
| LETLET0635    | <i>L. numidica</i>    |                                      | 32                  | 1                      | LET              | Morocco          | 31.130   | -7.900    |
| MACBRA0203    | <i>G. maculosus</i>   | KF806051                             | 33                  |                        | BRA              | Bragança         | 41.688   | -6.751    |
| MACBRA0204    | <i>G. maculosus</i>   | KF806052                             | 33                  |                        | BRA              | Bragança         | 41.688   | -6.751    |
| MACBRA0205    | <i>G. maculosus</i>   | KF806053                             | 33                  |                        | BRA              | Bragança         | 41.688   | -6.751    |
| MACBRA0206    | <i>G. maculosus</i>   | KF806054                             | 33                  |                        | BRA              | Bragança         | 41.688   | -6.751    |
| MACBRA0207    | <i>G. maculosus</i>   | KF806055                             | 33                  |                        | BRA              | Bragança         | 41.688   | -6.751    |
| MACBRA0208    | <i>G. maculosus</i>   | KF806056                             | 33                  |                        | BRA              | Bragança         | 41.688   | -6.751    |
| MACBRA0209    | <i>G. maculosus</i>   | KF806057                             | 33                  |                        | BRA              | Bragança         | 41.688   | -6.751    |
| MACBRA0210    | <i>G. maculosus</i>   | KF806058                             | 33                  | 15                     | BRA              | Bragança         | 41.688   | -6.751    |
| MACBRA0211    | <i>G. maculosus</i>   | KF806059                             | 33                  |                        | BRA              | Bragança         | 41.688   | -6.751    |
| MACBRA0212    | <i>G. maculosus</i>   | KF806060                             | 33                  |                        | BRA              | Bragança         | 41.688   | -6.751    |
| MACBRA0213    | <i>G. maculosus</i>   | KF806061                             | 33                  |                        | BRA              | Bragança         | 41.688   | -6.751    |
| MACBRA0214    | <i>G. maculosus</i>   | KF806062                             | 33                  |                        | BRA              | Bragança         | 41.688   | -6.751    |
| MACBRA0215    | <i>G. maculosus</i>   | KF806063                             | 33                  |                        | BRA              | Bragança         | 41.688   | -6.751    |
| MACBRA0216    | <i>G. maculosus</i>   | KF806064                             | 33                  |                        | BRA              | Bragança         | 41.688   | -6.751    |
| MACBRA0492    | <i>G. maculosus</i>   | KF806065                             | 33                  |                        | BRA              | Bragança         | 41.688   | -6.751    |
| MACCAa0922    | <i>G. maculosus</i>   | KF806066                             | 34                  |                        | CAa              | Asturias         | 42.949   | -6.395    |
| MACCAa0923    | <i>G. maculosus</i>   | KF806067                             | 34                  |                        | CAa              | Asturias         | 42.949   | -6.395    |
| MACCAa0924    | <i>G. maculosus</i>   | KF806068                             | 34                  |                        | CAa              | Asturias         | 42.949   | -6.395    |
| MACCAa0925    | <i>G. maculosus</i>   | KF806069                             | 34                  | 7                      | CAa              | Asturias         | 42.949   | -6.395    |
| MACCAa0926    | <i>G. maculosus</i>   | KF806070                             | 34                  |                        | CAa              | Asturias         | 42.949   | -6.395    |
| MACCAa0927    | <i>G. maculosus</i>   | KF806071                             | 34                  |                        | CAa              | Asturias         | 42.949   | -6.395    |
| MACCAa0928    | <i>G. maculosus</i>   | KF806072                             | 34                  |                        | CAa              | Asturias         | 42.949   | -6.395    |
| MACCAb0806    | <i>G. maculosus</i>   | KF806073                             | 35                  |                        | CAb              | Asturias         | 42.955   | -6.372    |
| MACCAb0807    | <i>G. maculosus</i>   | KF806074                             | 35                  |                        | CAb              | Asturias         | 42.955   | -6.372    |
| MACCAb0808    | <i>G. maculosus</i>   | KF806075                             | 35                  |                        | CAb              | Asturias         | 42.955   | -6.372    |
| MACCAb0809    | <i>G. maculosus</i>   | KF806076                             | 35                  |                        | CAb              | Asturias         | 42.955   | -6.372    |
| MACCAb0810    | <i>G. maculosus</i>   | KF806077                             | 35                  | 8                      | CAb              | Asturias         | 42.955   | -6.372    |
| MACCAb0811    | <i>G. maculosus</i>   | KF806078                             | 35                  |                        | CAb              | Asturias         | 42.955   | -6.372    |
| MACCAb0812    | <i>G. maculosus</i>   | KF806079                             | 35                  |                        | CAb              | Asturias         | 42.955   | -6.372    |
| MACCAb0813    | <i>G. maculosus</i>   | KF806080                             | 35                  |                        | CAb              | Asturias         | 42.955   | -6.372    |
| MACCHA1708    | <i>G. maculosus</i>   | KF806081                             | 36                  |                        | CHA              | Serra da Estrela | 40.539   | -7.313    |

| Collection ID | Species             | COI Genebank<br>Accession<br>Numbers | Haplotype<br>number | Number of<br>sequences | Location<br>Code | Region           | Latitude | Longitude |
|---------------|---------------------|--------------------------------------|---------------------|------------------------|------------------|------------------|----------|-----------|
| MACCHA1765    | <i>G. maculosus</i> | KF806082                             | 36                  |                        | CHA              | Serra da Estrela | 40.539   | -7.313    |
| MACCHA0284    | <i>G. maculosus</i> | KF806083                             | 36                  |                        | CHA              | Serra da Estrela | 40.539   | -7.313    |
| MACCHA0285    | <i>G. maculosus</i> | KF806084                             | 36                  |                        | CHA              | Serra da Estrela | 40.539   | -7.313    |
| MACCHA0287    | <i>G. maculosus</i> | KF806086                             | 36                  |                        | CHA              | Serra da Estrela | 40.539   | -7.313    |
| MACCHA0289    | <i>G. maculosus</i> | KF806088                             | 36                  | 11                     | CHA              | Serra da Estrela | 40.539   | -7.313    |
| MACCHA0290    | <i>G. maculosus</i> | KF806089                             | 36                  |                        | CHA              | Serra da Estrela | 40.539   | -7.313    |
| MACCHA0424    | <i>G. maculosus</i> | KF806090                             | 36                  |                        | CHA              | Serra da Estrela | 40.539   | -7.313    |
| MACCHA0425    | <i>G. maculosus</i> | KF806091                             | 36                  |                        | CHA              | Serra da Estrela | 40.539   | -7.313    |
| MACCHA0426    | <i>G. maculosus</i> | KF806092                             | 36                  |                        | CHA              | Serra da Estrela | 40.539   | -7.313    |
| MACCHA0427    | <i>G. maculosus</i> | KF806093                             | 36                  |                        | CHA              | Serra da Estrela | 40.539   | -7.313    |
| MACCHA0286    | <i>G. maculosus</i> | KF806085                             | 37                  | 2                      | CHA              | Serra da Estrela | 40.539   | -7.313    |
| MACCHA0288    | <i>G. maculosus</i> | KF806087                             | 37                  |                        | CHA              | Serra da Estrela | 40.539   | -7.313    |
| MACCAM0146    | <i>G. maculosus</i> | KF806094                             | 38                  |                        | CAM              | Serra da Estrela | 40.383   | -7.544    |
| MACCAM1877    | <i>G. maculosus</i> | KF806095                             | 38                  |                        | CAM              | Serra da Estrela | 40.383   | -7.544    |
| MACCAM1878    | <i>G. maculosus</i> | KF806096                             | 38                  |                        | CAM              | Serra da Estrela | 40.383   | -7.544    |
| MACCAM1879    | <i>G. maculosus</i> | KF806097                             | 38                  |                        | CAM              | Serra da Estrela | 40.383   | -7.544    |
| MACCAM1882    | <i>G. maculosus</i> | KF806100                             | 38                  |                        | CAM              | Serra da Estrela | 40.383   | -7.544    |
| MACCAM0269    | <i>G. maculosus</i> | KF806101                             | 38                  |                        | CAM              | Serra da Estrela | 40.383   | -7.544    |
| MACCAM0270    | <i>G. maculosus</i> | KF806102                             | 38                  |                        | CAM              | Serra da Estrela | 40.383   | -7.544    |
| MACCAM0271    | <i>G. maculosus</i> | KF806103                             | 38                  |                        | CAM              | Serra da Estrela | 40.383   | -7.544    |
| MACCAM0272    | <i>G. maculosus</i> | KF806104                             | 38                  | 18                     | CAM              | Serra da Estrela | 40.383   | -7.544    |
| MACCAM0273    | <i>G. maculosus</i> | KF806105                             | 38                  |                        | CAM              | Serra da Estrela | 40.383   | -7.544    |
| MACCAM0275    | <i>G. maculosus</i> | KF806106                             | 38                  |                        | CAM              | Serra da Estrela | 40.383   | -7.544    |
| MACCAM0276    | <i>G. maculosus</i> | KF806107                             | 38                  |                        | CAM              | Serra da Estrela | 40.383   | -7.544    |
| MACCAM0277    | <i>G. maculosus</i> | KF806108                             | 38                  |                        | CAM              | Serra da Estrela | 40.383   | -7.544    |
| MACCAM0278    | <i>G. maculosus</i> | KF806109                             | 38                  |                        | CAM              | Serra da Estrela | 40.383   | -7.544    |
| MACCAM0279    | <i>G. maculosus</i> | KF806110                             | 38                  |                        | CAM              | Serra da Estrela | 40.383   | -7.544    |
| MACCAM0281    | <i>G. maculosus</i> | KF806111                             | 38                  |                        | CAM              | Serra da Estrela | 40.383   | -7.544    |
| MACCAM0282    | <i>G. maculosus</i> | KF806112                             | 38                  |                        | CAM              | Serra da Estrela | 40.383   | -7.544    |
| MACCAM0283    | <i>G. maculosus</i> | KF806113                             | 38                  |                        | CAM              | Serra da Estrela | 40.383   | -7.544    |
| MACCAM1880    | <i>G. maculosus</i> | KF806098                             | 39                  | 2                      | CAM              | Serra da Estrela | 40.383   | -7.544    |
| MACCAM1881    | <i>G. maculosus</i> | KF806099                             | 39                  |                        | CAM              | Serra da Estrela | 40.383   | -7.544    |
| MACCOa0868    | <i>G. maculosus</i> | KF806114                             | 40                  |                        | COa              | Cantabria        | 43.307   | -5.053    |
| MACCOa0869    | <i>G. maculosus</i> | KF806115                             | 40                  |                        | COa              | Cantabria        | 43.307   | -5.053    |
| MACCOa0870    | <i>G. maculosus</i> | KF806116                             | 40                  | 5                      | COa              | Cantabria        | 43.307   | -5.053    |
| MACCOa0876    | <i>G. maculosus</i> | KF806122                             | 40                  |                        | COa              | Cantabria        | 43.307   | -5.053    |
| MACCOa0877    | <i>G. maculosus</i> | KF806123                             | 40                  |                        | COa              | Cantabria        | 43.307   | -5.053    |
| MACCOa0871    | <i>G. maculosus</i> | KF806117                             | 41                  |                        | COa              | Cantabria        | 43.307   | -5.053    |
| MACCOa0872    | <i>G. maculosus</i> | KF806118                             | 41                  |                        | COa              | Cantabria        | 43.307   | -5.053    |
| MACCOa0874    | <i>G. maculosus</i> | KF806120                             | 41                  | 5                      | COa              | Cantabria        | 43.307   | -5.053    |
| MACCOa0875    | <i>G. maculosus</i> | KF806121                             | 41                  |                        | COa              | Cantabria        | 43.307   | -5.053    |
| MACCOa0878    | <i>G. maculosus</i> | KF806124                             | 41                  |                        | COa              | Cantabria        | 43.307   | -5.053    |
| MACCOa0873    | <i>G. maculosus</i> | KF806119                             | 42                  | 2                      | COa              | Cantabria        | 43.307   | -5.053    |
| MACCOb1116    | <i>G. maculosus</i> | KF806126                             | 42                  |                        | COb              | Cantabria        | 43.307   | -5.053    |
| MACCOa0879    | <i>G. maculosus</i> | KF806125                             | 43                  |                        | COa              | Cantabria        | 43.307   | -5.053    |
| MACSAA0714    | <i>G. maculosus</i> | KF806220                             | 43                  |                        | SAA              | Picos de Europa  | 43.238   | -4.227    |
| MACSAA0715    | <i>G. maculosus</i> | KF806221                             | 43                  |                        | SAA              | Picos de Europa  | 43.238   | -4.227    |
| MACSAA0716    | <i>G. maculosus</i> | KF806222                             | 43                  |                        | SAA              | Picos de Europa  | 43.238   | -4.227    |
| MACSAA0717    | <i>G. maculosus</i> | KF806223                             | 43                  |                        | SAA              | Picos de Europa  | 43.238   | -4.227    |
| MACSAA0718    | <i>G. maculosus</i> | KF806224                             | 43                  |                        | SAA              | Picos de Europa  | 43.238   | -4.227    |
| MACSAA0719    | <i>G. maculosus</i> | KF806225                             | 43                  |                        | SAA              | Picos de Europa  | 43.238   | -4.227    |
| MACSAA0720    | <i>G. maculosus</i> | KF806226                             | 43                  | 15                     | SAA              | Picos de Europa  | 43.238   | -4.227    |
| MACSAA0721    | <i>G. maculosus</i> | KF806227                             | 43                  |                        | SAA              | Picos de Europa  | 43.238   | -4.227    |
| MACSAA0722    | <i>G. maculosus</i> | KF806228                             | 43                  |                        | SAA              | Picos de Europa  | 43.238   | -4.227    |
| MACSAA0724    | <i>G. maculosus</i> | KF806230                             | 43                  |                        | SAA              | Picos de Europa  | 43.238   | -4.227    |
| MACSAA0725    | <i>G. maculosus</i> | KF806231                             | 43                  |                        | SAA              | Picos de Europa  | 43.238   | -4.227    |
| MACSAA0726    | <i>G. maculosus</i> | KF806232                             | 43                  |                        | SAA              | Picos de Europa  | 43.238   | -4.227    |
| MACSAA0728    | <i>G. maculosus</i> | KF806234                             | 43                  |                        | SAA              | Picos de Europa  | 43.238   | -4.227    |
| MACSAA0729    | <i>G. maculosus</i> | KF806235                             | 43                  |                        | SAA              | Picos de Europa  | 43.238   | -4.227    |
| MACCOb1117    | <i>G. maculosus</i> | KF806127                             | 44                  | 1                      | COb              | Cantabria        | 43.341   | -5.084    |
| MACGUA0230    | <i>G. maculosus</i> | KF806128                             | 45                  |                        | GUA              | Serra da Estrela | 40.535   | -7.273    |
| MACGUA0401    | <i>G. maculosus</i> | KF806129                             | 45                  |                        | GUA              | Serra da Estrela | 40.535   | -7.273    |
| MACGUA0402    | <i>G. maculosus</i> | KF806130                             | 45                  |                        | GUA              | Serra da Estrela | 40.535   | -7.273    |
| MACGUA0403    | <i>G. maculosus</i> | KF806131                             | 45                  |                        | GUA              | Serra da Estrela | 40.535   | -7.273    |
| MACGUA0404    | <i>G. maculosus</i> | KF806132                             | 45                  |                        | GUA              | Serra da Estrela | 40.535   | -7.273    |
| MACGUA0405    | <i>G. maculosus</i> | KF806133                             | 45                  |                        | GUA              | Serra da Estrela | 40.535   | -7.273    |
| MACGUA0406    | <i>G. maculosus</i> | KF806134                             | 45                  |                        | GUA              | Serra da Estrela | 40.535   | -7.273    |
| MACGUA0408    | <i>G. maculosus</i> | KF806135                             | 45                  |                        | GUA              | Serra da Estrela | 40.535   | -7.273    |
| MACGUA0409    | <i>G. maculosus</i> | KF806136                             | 45                  | 16                     | GUA              | Serra da Estrela | 40.535   | -7.273    |
| MACGUA0410    | <i>G. maculosus</i> | KF806137                             | 45                  |                        | GUA              | Serra da Estrela | 40.535   | -7.273    |
| MACGUA0411    | <i>G. maculosus</i> | KF806138                             | 45                  |                        | GUA              | Serra da Estrela | 40.535   | -7.273    |
| MACGUA0412    | <i>G. maculosus</i> | KF806139                             | 45                  |                        | GUA              | Serra da Estrela | 40.535   | -7.273    |
| MACGUA0413    | <i>G. maculosus</i> | KF806140                             | 45                  |                        | GUA              | Serra da Estrela | 40.535   | -7.273    |
| MACGUA0414    | <i>G. maculosus</i> | KF806141                             | 45                  |                        | GUA              | Serra da Estrela | 40.535   | -7.273    |
| MACGUA0415    | <i>G. maculosus</i> | KF806142                             | 45                  |                        | GUA              | Serra da Estrela | 40.535   | -7.273    |
| MACGUA0416    | <i>G. maculosus</i> | KF806143                             | 45                  |                        | GUA              | Serra da Estrela | 40.535   | -7.273    |
| MACGEf1499    | <i>G. maculosus</i> | KF806144                             | 46                  |                        | GEf              | Geres            | 41.793   | -8.138    |
| MACGEf0817    | <i>G. maculosus</i> | KF806145                             | 46                  |                        | GEf              | Geres            | 41.793   | -8.138    |
| MACGEf0818    | <i>G. maculosus</i> | KF806146                             | 46                  | 6                      | GEf              | Geres            | 41.793   | -8.138    |

| Collection ID | Species             | COI Genebank<br>Accession<br>Numbers | Haplotype<br>number | Number of<br>sequences | Location<br>Code | Region           | Latitude | Longitude |
|---------------|---------------------|--------------------------------------|---------------------|------------------------|------------------|------------------|----------|-----------|
| MACGEf0819    | <i>G. maculosus</i> | KF806147                             | 46                  | 1                      | Gef              | Geres            | 41.793   | -8.138    |
| MACGEf0822    | <i>G. maculosus</i> | KF806150                             | 46                  | 1                      | Gef              | Geres            | 41.793   | -8.138    |
| MACGEf0823    | <i>G. maculosus</i> | KF806151                             | 46                  | 1                      | Gef              | Geres            | 41.793   | -8.138    |
| MACGEf0820    | <i>G. maculosus</i> | KF806148                             | 47                  | 2                      | Gef              | Geres            | 41.793   | -8.138    |
| MACGEf0821    | <i>G. maculosus</i> | KF806149                             | 47                  | 1                      | Gef              | Geres            | 41.793   | -8.138    |
| MACWAT0428    | <i>G. maculosus</i> | KF806152                             | 48                  | 1                      | WAT              | Ireland          | 51.829   | -10.175   |
| MACWAT0429    | <i>G. maculosus</i> | KF806153                             | 48                  | 1                      | WAT              | Ireland          | 51.829   | -10.175   |
| MACWAT0430    | <i>G. maculosus</i> | KF806154                             | 48                  | 1                      | WAT              | Ireland          | 51.829   | -10.175   |
| MACWAT0431    | <i>G. maculosus</i> | KF806155                             | 48                  | 1                      | WAT              | Ireland          | 51.829   | -10.175   |
| MACWAT0432    | <i>G. maculosus</i> | KF806156                             | 48                  | 1                      | WAT              | Ireland          | 51.829   | -10.175   |
| MACWAT0433    | <i>G. maculosus</i> | KF806157                             | 48                  | 1                      | WAT              | Ireland          | 51.829   | -10.175   |
| MACWAT0434    | <i>G. maculosus</i> | KF806158                             | 48                  | 1                      | WAT              | Ireland          | 51.829   | -10.175   |
| MACWAT0435    | <i>G. maculosus</i> | KF806159                             | 48                  | 15                     | WAT              | Ireland          | 51.829   | -10.175   |
| MACWAT0436    | <i>G. maculosus</i> | KF806160                             | 48                  | 1                      | WAT              | Ireland          | 51.829   | -10.175   |
| MACWAT0437    | <i>G. maculosus</i> | KF806161                             | 48                  | 1                      | WAT              | Ireland          | 51.829   | -10.175   |
| MACWAT0438    | <i>G. maculosus</i> | KF806162                             | 48                  | 1                      | WAT              | Ireland          | 51.829   | -10.175   |
| MACWAT0439    | <i>G. maculosus</i> | KF806163                             | 48                  | 1                      | WAT              | Ireland          | 51.829   | -10.175   |
| MACWAT0440    | <i>G. maculosus</i> | KF806164                             | 48                  | 1                      | WAT              | Ireland          | 51.829   | -10.175   |
| MACWAT0441    | <i>G. maculosus</i> | KF806165                             | 48                  | 1                      | WAT              | Ireland          | 51.829   | -10.175   |
| MACWAT0442    | <i>G. maculosus</i> | KF806166                             | 48                  | 1                      | WAT              | Ireland          | 51.829   | -10.175   |
| MACMAN1231    | <i>G. maculosus</i> | KF806167                             | 49                  | 1                      | MAN              | Ourense          | 42.310   | -7.237    |
| MACMAN1232    | <i>G. maculosus</i> | KF806168                             | 49                  | 1                      | MAN              | Ourense          | 42.310   | -7.237    |
| MACMAN1233    | <i>G. maculosus</i> | KF806169                             | 49                  | 1                      | MAN              | Ourense          | 42.310   | -7.237    |
| MACMAN1234    | <i>G. maculosus</i> | KF806170                             | 49                  | 1                      | MAN              | Ourense          | 42.310   | -7.237    |
| MACMAN1235    | <i>G. maculosus</i> | KF806171                             | 49                  | 1                      | MAN              | Ourense          | 42.310   | -7.237    |
| MACMAN1236    | <i>G. maculosus</i> | KF806172                             | 49                  | 11                     | MAN              | Ourense          | 42.310   | -7.237    |
| MACMAN1237    | <i>G. maculosus</i> | KF806173                             | 49                  | 1                      | MAN              | Ourense          | 42.310   | -7.237    |
| MACMAN1238    | <i>G. maculosus</i> | KF806174                             | 49                  | 1                      | MAN              | Ourense          | 42.310   | -7.237    |
| MACMAN1239    | <i>G. maculosus</i> | KF806175                             | 49                  | 1                      | MAN              | Ourense          | 42.310   | -7.237    |
| MACMAN1241    | <i>G. maculosus</i> | KF806177                             | 49                  | 1                      | MAN              | Ourense          | 42.310   | -7.237    |
| MACMAN1243    | <i>G. maculosus</i> | KF806179                             | 49                  | 1                      | MAN              | Ourense          | 42.310   | -7.237    |
| MACMAN1240    | <i>G. maculosus</i> | KF806176                             | 50                  | 2                      | MAN              | Ourense          | 42.310   | -7.237    |
| MACMAN1242    | <i>G. maculosus</i> | KF806178                             | 50                  | 1                      | MAN              | Ourense          | 42.310   | -7.237    |
| MACHOb0357    | <i>G. maculosus</i> | KF806180                             | 51                  | 1                      | HOb              | Geres            | 41.834   | -8.119    |
| MACHOb0358    | <i>G. maculosus</i> | KF806181                             | 51                  | 1                      | HOb              | Geres            | 41.834   | -8.119    |
| MACHOb0359    | <i>G. maculosus</i> | KF806182                             | 51                  | 1                      | HOb              | Geres            | 41.834   | -8.119    |
| MACHOb0929    | <i>G. maculosus</i> | KF806183                             | 51                  | 8                      | HOb              | Geres            | 41.834   | -8.119    |
| MACHOb0930    | <i>G. maculosus</i> | KF806184                             | 51                  | 1                      | HOb              | Geres            | 41.834   | -8.119    |
| MACHOb0931    | <i>G. maculosus</i> | KF806185                             | 51                  | 1                      | HOb              | Geres            | 41.834   | -8.119    |
| MACHOb0933    | <i>G. maculosus</i> | KF806187                             | 51                  | 1                      | HOb              | Geres            | 41.834   | -8.119    |
| MACHOb0934    | <i>G. maculosus</i> | KF806188                             | 51                  | 1                      | HOb              | Geres            | 41.834   | -8.119    |
| MACHOb0932    | <i>G. maculosus</i> | KF806186                             | 52                  | 1                      | HOb              | Geres            | 41.834   | -8.119    |
| MACPOR0232    | <i>G. maculosus</i> | KF806189                             | 53                  | 1                      | POR              | Viana do Castelo | 41.705   | -8.792    |
| MACSEE0217    | <i>G. maculosus</i> | KF806190                             | 54                  | 1                      | SEE              | Viana do Castelo | 41.774   | -8.619    |
| MACSEE0218    | <i>G. maculosus</i> | KF806191                             | 54                  | 1                      | SEE              | Viana do Castelo | 41.774   | -8.619    |
| MACSEE0219    | <i>G. maculosus</i> | KF806192                             | 54                  | 1                      | SEE              | Viana do Castelo | 41.774   | -8.619    |
| MACSEE0221    | <i>G. maculosus</i> | KF806194                             | 54                  | 1                      | SEE              | Viana do Castelo | 41.774   | -8.619    |
| MACSEE0222    | <i>G. maculosus</i> | KF806195                             | 54                  | 1                      | SEE              | Viana do Castelo | 41.774   | -8.619    |
| MACSEE0223    | <i>G. maculosus</i> | KF806196                             | 54                  | 1                      | SEE              | Viana do Castelo | 41.774   | -8.619    |
| MACSEE0224    | <i>G. maculosus</i> | KF806198                             | 54                  | 13                     | SEE              | Viana do Castelo | 41.774   | -8.619    |
| MACSEE0226    | <i>G. maculosus</i> | KF806214                             | 54                  | 1                      | SEE              | Viana do Castelo | 41.774   | -8.619    |
| MACSEE0234    | <i>G. maculosus</i> | KF806215                             | 54                  | 1                      | SEE              | Viana do Castelo | 41.774   | -8.619    |
| MACSEE0235    | <i>G. maculosus</i> | KF806216                             | 54                  | 1                      | SEE              | Viana do Castelo | 41.774   | -8.619    |
| MACSEE0236    | <i>G. maculosus</i> | KF806217                             | 54                  | 1                      | SEE              | Viana do Castelo | 41.774   | -8.619    |
| MACSEE0237    | <i>G. maculosus</i> | KF806218                             | 54                  | 1                      | SEE              | Viana do Castelo | 41.774   | -8.619    |
| MACSEE0238    | <i>G. maculosus</i> | KF806219                             | 54                  | 1                      | SEE              | Viana do Castelo | 41.774   | -8.619    |
| MACSEE0220    | <i>G. maculosus</i> | KF806193                             | 55                  | 2                      | SEE              | Viana do Castelo | 41.774   | -8.619    |
| MACSEE0225    | <i>G. maculosus</i> | KF806209                             | 55                  | 1                      | SEE              | Viana do Castelo | 41.774   | -8.619    |
| MACSEb0239    | <i>G. maculosus</i> | KF806197                             | 56                  | 1                      | SEb              | Serra da Estrela | 40.414   | -7.587    |
| MACSEb0240    | <i>G. maculosus</i> | KF806199                             | 56                  | 1                      | SEb              | Serra da Estrela | 40.414   | -7.587    |
| MACSEb0241    | <i>G. maculosus</i> | KF806200                             | 56                  | 1                      | SEb              | Serra da Estrela | 40.414   | -7.587    |
| MACSEb0242    | <i>G. maculosus</i> | KF806201                             | 56                  | 1                      | SEb              | Serra da Estrela | 40.414   | -7.587    |
| MACSEb0243    | <i>G. maculosus</i> | KF806202                             | 56                  | 1                      | SEb              | Serra da Estrela | 40.414   | -7.587    |
| MACSEb0244    | <i>G. maculosus</i> | KF806203                             | 56                  | 1                      | SEb              | Serra da Estrela | 40.414   | -7.587    |
| MACSEb0245    | <i>G. maculosus</i> | KF806204                             | 56                  | 1                      | SEb              | Serra da Estrela | 40.414   | -7.587    |
| MACSEb0246    | <i>G. maculosus</i> | KF806205                             | 56                  | 15                     | SEb              | Serra da Estrela | 40.414   | -7.587    |
| MACSEb0247    | <i>G. maculosus</i> | KF806206                             | 56                  | 1                      | SEb              | Serra da Estrela | 40.414   | -7.587    |
| MACSEb0248    | <i>G. maculosus</i> | KF806207                             | 56                  | 1                      | SEb              | Serra da Estrela | 40.414   | -7.587    |
| MACSEb0249    | <i>G. maculosus</i> | KF806208                             | 56                  | 1                      | SEb              | Serra da Estrela | 40.414   | -7.587    |
| MACSEb0250    | <i>G. maculosus</i> | KF806210                             | 56                  | 1                      | SEb              | Serra da Estrela | 40.414   | -7.587    |
| MACSEb0251    | <i>G. maculosus</i> | KF806211                             | 56                  | 1                      | SEb              | Serra da Estrela | 40.414   | -7.587    |
| MACSEb0252    | <i>G. maculosus</i> | KF806212                             | 56                  | 1                      | SEb              | Serra da Estrela | 40.414   | -7.587    |
| MACSEb0253    | <i>G. maculosus</i> | KF806213                             | 56                  | 1                      | SEb              | Serra da Estrela | 40.414   | -7.587    |
| MACSAA0723    | <i>G. maculosus</i> | KF806229                             | 57                  | 1                      | SAA              | Picos de Europa  | 43.238   | -4.227    |
| MACSAA0727    | <i>G. maculosus</i> | KF806233                             | 58                  | 1                      | SAA              | Picos de Europa  | 43.238   | -4.227    |
| MACCOM0841    | <i>G. maculosus</i> | KF806236                             | 59                  | 1                      | COM              | Coruña           | 42.878   | -8.555    |
| MACCOM0844    | <i>G. maculosus</i> | KF806239                             | 59                  | 1                      | COM              | Coruña           | 42.878   | -8.555    |
| MACCOM0845    | <i>G. maculosus</i> | KF806240                             | 59                  | 1                      | COM              | Coruña           | 42.878   | -8.555    |
| MACCOM0846    | <i>G. maculosus</i> | KF806241                             | 59                  | 1                      | COM              | Coruña           | 42.878   | -8.555    |

| Collection ID | Species              | COI Genebank<br>Accession<br>Numbers | Haplotype<br>number | Number of<br>sequences | Location<br>Code | Region          | Latitude | Longitude |
|---------------|----------------------|--------------------------------------|---------------------|------------------------|------------------|-----------------|----------|-----------|
| MACCOM0847    | <i>G. maculosus</i>  | KF806242                             | 59                  | 12                     | COM              | Coruña          | 42.878   | -8.555    |
| MACCOM0848    | <i>G. maculosus</i>  | KF806243                             | 59                  |                        | COM              | Coruña          | 42.878   | -8.555    |
| MACCOM0849    | <i>G. maculosus</i>  | KF806244                             | 59                  |                        | COM              | Coruña          | 42.878   | -8.555    |
| MACCOM0850    | <i>G. maculosus</i>  | KF806245                             | 59                  |                        | COM              | Coruña          | 42.878   | -8.555    |
| MACCOM0851    | <i>G. maculosus</i>  | KF806246                             | 59                  |                        | COM              | Coruña          | 42.878   | -8.555    |
| MACCOM0852    | <i>G. maculosus</i>  | KF806247                             | 59                  |                        | COM              | Coruña          | 42.878   | -8.555    |
| MACCOM0853    | <i>G. maculosus</i>  | KF806248                             | 59                  |                        | COM              | Coruña          | 42.878   | -8.555    |
| MACCOM0855    | <i>G. maculosus</i>  | KF806250                             | 59                  | COM                    | Coruña           | 42.878          | -8.555   |           |
| MACCOM0842    | <i>G. maculosus</i>  | KF806237                             | 60                  | 4                      | COM              | Coruña          | 42.878   | -8.555    |
| MACCOM0843    | <i>G. maculosus</i>  | KF806238                             | 60                  |                        | COM              | Coruña          | 42.878   | -8.555    |
| MACCOM0854    | <i>G. maculosus</i>  | KF806249                             | 60                  |                        | COM              | Coruña          | 42.878   | -8.555    |
| MACCOM0856    | <i>G. maculosus</i>  | KF806251                             | 60                  |                        | COM              | Coruña          | 42.878   | -8.555    |
| MACMAR0762    | <i>G. maculosus</i>  | KF806252                             | 61                  | 15                     | MAR              | Picos de Europa | 43.388   | -4.110    |
| MACMAR0763    | <i>G. maculosus</i>  | KF806253                             | 61                  |                        | MAR              | Picos de Europa | 43.388   | -4.110    |
| MACMAR0764    | <i>G. maculosus</i>  | KF806254                             | 61                  |                        | MAR              | Picos de Europa | 43.388   | -4.110    |
| MACMAR0765    | <i>G. maculosus</i>  | KF806255                             | 61                  |                        | MAR              | Picos de Europa | 43.388   | -4.110    |
| MACMAR0766    | <i>G. maculosus</i>  | KF806256                             | 61                  |                        | MAR              | Picos de Europa | 43.388   | -4.110    |
| MACMAR0767    | <i>G. maculosus</i>  | KF806257                             | 61                  |                        | MAR              | Picos de Europa | 43.388   | -4.110    |
| MACMAR0768    | <i>G. maculosus</i>  | KF806258                             | 61                  |                        | MAR              | Picos de Europa | 43.388   | -4.110    |
| MACMAR0769    | <i>G. maculosus</i>  | KF806259                             | 61                  |                        | MAR              | Picos de Europa | 43.388   | -4.110    |
| MACMAR0770    | <i>G. maculosus</i>  | KF806260                             | 61                  |                        | MAR              | Picos de Europa | 43.388   | -4.110    |
| MACMAR0771    | <i>G. maculosus</i>  | KF806261                             | 61                  |                        | MAR              | Picos de Europa | 43.388   | -4.110    |
| MACMAR0772    | <i>G. maculosus</i>  | KF806262                             | 61                  |                        | MAR              | Picos de Europa | 43.388   | -4.110    |
| MACMAR0773    | <i>G. maculosus</i>  | KF806263                             | 61                  |                        | MAR              | Picos de Europa | 43.388   | -4.110    |
| MACMAR0774    | <i>G. maculosus</i>  | KF806264                             | 61                  |                        | MAR              | Picos de Europa | 43.388   | -4.110    |
| MACMAR0775    | <i>G. maculosus</i>  | KF806265                             | 61                  |                        | MAR              | Picos de Europa | 43.388   | -4.110    |
| MACMAR0776    | <i>G. maculosus</i>  | KF806266                             | 61                  |                        | MAR              | Picos de Europa | 43.388   | -4.110    |
| MACVOa0967    | <i>G. maculosus</i>  | KF806267                             | 62                  | 1                      | VOa              | Vouzela         | 40.721   | -8.109    |
| MACVOa0968    | <i>G. maculosus</i>  | KF806268                             | 63                  | 3                      | VOa              | Vouzela         | 40.721   | -8.109    |
| MACVOa0969    | <i>G. maculosus</i>  | KF806269                             | 63                  |                        | VOa              | Vouzela         | 40.721   | -8.109    |
| MACVOa0972    | <i>G. maculosus</i>  | KF806272                             | 63                  |                        | VOa              | Vouzela         | 40.721   | -8.109    |
| MACVOa0970    | <i>G. maculosus</i>  | KF806270                             | 64                  | 3                      | VOa              | Vouzela         | 40.721   | -8.109    |
| MACVOa0971    | <i>G. maculosus</i>  | KF806271                             | 64                  |                        | VOa              | Vouzela         | 40.721   | -8.109    |
| MACVOa0973    | <i>G. maculosus</i>  | KF806273                             | 64                  |                        | VOa              | Vouzela         | 40.721   | -8.109    |
| MALBRE0184    | <i>G. malagensis</i> | KF806274                             | 65                  | 37                     | BRE              | Sesimbra        | 38.541   | -9.030    |
| MALBRE0183    | <i>G. malagensis</i> | KF806275                             | 65                  |                        | BRE              | Sesimbra        | 38.541   | -9.030    |
| MALBRE1224    | <i>G. malagensis</i> | KF806276                             | 65                  |                        | BRE              | Sesimbra        | 38.541   | -9.030    |
| MALBRE1225    | <i>G. malagensis</i> | KF806277                             | 65                  |                        | BRE              | Sesimbra        | 38.541   | -9.030    |
| MALBRE1226    | <i>G. malagensis</i> | KF806278                             | 65                  |                        | BRE              | Sesimbra        | 38.541   | -9.030    |
| MALBRE1229    | <i>G. malagensis</i> | KF806279                             | 65                  |                        | BRE              | Sesimbra        | 38.541   | -9.030    |
| MALBRE0181    | <i>G. malagensis</i> | KF806280                             | 65                  |                        | BRE              | Sesimbra        | 38.541   | -9.030    |
| MALBRE0182    | <i>G. malagensis</i> | KF806281                             | 65                  |                        | BRE              | Sesimbra        | 38.541   | -9.030    |
| MALSSb1831    | <i>G. malagensis</i> | KF806282                             | 65                  |                        | SSb              | Sesimbra        | 38.479   | -9.113    |
| MALSSb1832    | <i>G. malagensis</i> | KF806283                             | 65                  |                        | SSb              | Sesimbra        | 38.479   | -9.113    |
| MALSSb1833    | <i>G. malagensis</i> | KF806284                             | 65                  |                        | SSb              | Sesimbra        | 38.479   | -9.113    |
| MALSSb1834    | <i>G. malagensis</i> | KF806285                             | 65                  |                        | SSb              | Sesimbra        | 38.479   | -9.113    |
| MALSSb1835    | <i>G. malagensis</i> | KF806286                             | 65                  |                        | SSb              | Sesimbra        | 38.479   | -9.113    |
| MALSSb1836    | <i>G. malagensis</i> | KF806287                             | 65                  |                        | SSb              | Sesimbra        | 38.479   | -9.113    |
| MALSSb1837    | <i>G. malagensis</i> | KF806288                             | 65                  |                        | SSb              | Sesimbra        | 38.479   | -9.113    |
| MALSSb1838    | <i>G. malagensis</i> | KF806289                             | 65                  |                        | SSb              | Sesimbra        | 38.479   | -9.113    |
| MALSSb1839    | <i>G. malagensis</i> | KF806290                             | 65                  |                        | SSb              | Sesimbra        | 38.479   | -9.113    |
| MALSSb1840    | <i>G. malagensis</i> | KF806291                             | 65                  |                        | SSb              | Sesimbra        | 38.479   | -9.113    |
| MALSSb1841    | <i>G. malagensis</i> | KF806292                             | 65                  |                        | SSb              | Sesimbra        | 38.479   | -9.113    |
| MALSSb1842    | <i>G. malagensis</i> | KF806293                             | 65                  |                        | SSb              | Sesimbra        | 38.479   | -9.113    |
| MALSSb1843    | <i>G. malagensis</i> | KF806294                             | 65                  |                        | SSb              | Sesimbra        | 38.479   | -9.113    |
| MALSSb1844    | <i>G. malagensis</i> | KF806295                             | 65                  |                        | SSb              | Sesimbra        | 38.479   | -9.113    |
| MALCLb1535    | <i>G. malagensis</i> | KF806302                             | 65                  |                        | CLb              | Huelva          | 37.679   | -6.650    |
| MALCLb1536    | <i>G. malagensis</i> | KF806303                             | 65                  |                        | CLb              | Huelva          | 37.679   | -6.650    |
| MALCLb1542    | <i>G. malagensis</i> | KF806309                             | 65                  |                        | CLb              | Huelva          | 37.679   | -6.650    |
| MALCLb1543    | <i>G. malagensis</i> | KF806310                             | 65                  |                        | CLb              | Huelva          | 37.679   | -6.650    |
| MALSSa0154    | <i>G. malagensis</i> | KF806350                             | 65                  |                        | SSa              | Sesimbra        | 38.486   | -9.121    |
| MALSSa0155    | <i>G. malagensis</i> | KF806351                             | 65                  |                        | SSa              | Sesimbra        | 38.486   | -9.121    |
| MALSSa0156    | <i>G. malagensis</i> | KF806352                             | 65                  |                        | SSa              | Sesimbra        | 38.486   | -9.121    |
| MALSSa0159    | <i>G. malagensis</i> | KF806353                             | 65                  |                        | SSa              | Sesimbra        | 38.486   | -9.121    |
| MALSSa0160    | <i>G. malagensis</i> | KF806354                             | 65                  |                        | SSa              | Sesimbra        | 38.486   | -9.121    |
| MALSSa0161    | <i>G. malagensis</i> | KF806355                             | 65                  |                        | SSa              | Sesimbra        | 38.486   | -9.121    |
| MALSSa0681    | <i>G. malagensis</i> | KF806356                             | 65                  |                        | SSa              | Sesimbra        | 38.486   | -9.121    |
| MALSSa0682    | <i>G. malagensis</i> | KF806357                             | 65                  |                        | SSa              | Sesimbra        | 38.486   | -9.121    |
| MALSSa0683    | <i>G. malagensis</i> | KF806358                             | 65                  |                        | SSa              | Sesimbra        | 38.486   | -9.121    |
| MALSSa0498    | <i>G. malagensis</i> | KF806362                             | 65                  |                        | SSa              | Sesimbra        | 38.486   | -9.121    |
| MALSSa0153    | <i>G. malagensis</i> | KF806363                             | 65                  |                        | SSa              | Sesimbra        | 38.486   | -9.121    |
| MALCLa0390    | <i>G. malagensis</i> | KF806296                             | 66                  | 13                     | CLa              | Huelva          | 37.679   | -6.653    |
| MALCLb1530    | <i>G. malagensis</i> | KF806297                             | 66                  |                        | CLb              | Huelva          | 37.679   | -6.650    |
| MALCLb1537    | <i>G. malagensis</i> | KF806304                             | 66                  |                        | CLb              | Huelva          | 37.679   | -6.650    |
| MALCLb1538    | <i>G. malagensis</i> | KF806305                             | 66                  |                        | CLb              | Huelva          | 37.679   | -6.650    |
| MALCLb1539    | <i>G. malagensis</i> | KF806306                             | 66                  |                        | CLb              | Huelva          | 37.679   | -6.650    |
| MALGla0510    | <i>G. malagensis</i> | KF806333                             | 66                  |                        | Gla              | Gibraltar       | 36.131   | -5.351    |
| MALGla0512    | <i>G. malagensis</i> | KF806335                             | 66                  |                        | Gla              | Gibraltar       | 36.131   | -5.351    |
| MALGla0517    | <i>G. malagensis</i> | KF806340                             | 66                  |                        | Gla              | Gibraltar       | 36.131   | -5.351    |



| Collection ID | Species              | COI Genebank<br>Accession<br>Numbers | Haplotype<br>number | Number of<br>sequences | Location<br>Code | Region           | Latitude | Longitude |
|---------------|----------------------|--------------------------------------|---------------------|------------------------|------------------|------------------|----------|-----------|
| MALGla0518    | <i>G. malagensis</i> | KF806341                             | 66                  |                        | Gla              | Gibraltar        | 36.131   | -5.351    |
| MALGla0520    | <i>G. malagensis</i> | KF806343                             | 66                  |                        | Gla              | Gibraltar        | 36.131   | -5.351    |
| MALGla0523    | <i>G. malagensis</i> | KF806345                             | 66                  |                        | Gla              | Gibraltar        | 36.131   | -5.351    |
| MALGla0601    | <i>G. malagensis</i> | KF806347                             | 66                  |                        | Gla              | Gibraltar        | 36.131   | -5.351    |
| MALGla1603    | <i>G. malagensis</i> | KF806349                             | 66                  |                        | Gla              | Gibraltar        | 36.131   | -5.351    |
| MALCLb1531    | <i>G. malagensis</i> | KF806298                             | 67                  | 1                      | CLb              | Gibraltar        | 37.679   | -6.650    |
| MALCLb1532    | <i>G. malagensis</i> | KF806299                             | 68                  |                        | CLb              | Gibraltar        | 37.679   | -6.650    |
| MALCLb1533    | <i>G. malagensis</i> | KF806300                             | 68                  |                        | CLb              | Gibraltar        | 37.679   | -6.650    |
| MALCLb1534    | <i>G. malagensis</i> | KF806301                             | 68                  | 5                      | CLb              | Gibraltar        | 37.679   | -6.650    |
| MALCLb1540    | <i>G. malagensis</i> | KF806307                             | 68                  |                        | CLb              | Gibraltar        | 37.679   | -6.650    |
| MALCLb1541    | <i>G. malagensis</i> | KF806308                             | 68                  |                        | CLb              | Gibraltar        | 37.679   | -6.650    |
| MAJER0563     | <i>G. malagensis</i> | KF806311                             | 69                  |                        | JER              | Gibraltar        | 36.255   | -5.582    |
| MAJER0564     | <i>G. malagensis</i> | KF806312                             | 69                  | 4                      | JER              | Gibraltar        | 36.255   | -5.582    |
| MAJER0566     | <i>G. malagensis</i> | KF806314                             | 69                  |                        | JER              | Gibraltar        | 36.255   | -5.582    |
| MAJER0568     | <i>G. malagensis</i> | KF806316                             | 69                  |                        | JER              | Gibraltar        | 36.255   | -5.582    |
| MAJER0565     | <i>G. malagensis</i> | KF806313                             | 70                  | 1                      | JER              | Gibraltar        | 36.255   | -5.582    |
| MAJER0567     | <i>G. malagensis</i> | KF806315                             | 71                  | 1                      | JER              | Gibraltar        | 36.255   | -5.582    |
| MALGUE1845    | <i>G. malagensis</i> | KF806317                             | 72                  |                        | GUE              | Faro             | 37.098   | -7.922    |
| MALGUE1846    | <i>G. malagensis</i> | KF806318                             | 72                  |                        | GUE              | Faro             | 37.098   | -7.922    |
| MALGUE1861    | <i>G. malagensis</i> | KF806319                             | 72                  |                        | GUE              | Faro             | 37.098   | -7.922    |
| MALGUE1862    | <i>G. malagensis</i> | KF806320                             | 72                  |                        | GUE              | Faro             | 37.098   | -7.922    |
| MALGUE1876    | <i>G. malagensis</i> | KF806321                             | 72                  |                        | GUE              | Faro             | 37.098   | -7.922    |
| MALGUE1883    | <i>G. malagensis</i> | KF806322                             | 72                  |                        | GUE              | Faro             | 37.098   | -7.922    |
| MALGUE1884    | <i>G. malagensis</i> | KF806323                             | 72                  |                        | GUE              | Faro             | 37.098   | -7.922    |
| MALGUE1885    | <i>G. malagensis</i> | KF806324                             | 72                  |                        | GUE              | Faro             | 37.098   | -7.922    |
| MALGUE1798    | <i>G. malagensis</i> | KF806325                             | 72                  |                        | GUE              | Faro             | 37.098   | -7.922    |
| MALGUE1803    | <i>G. malagensis</i> | KF806326                             | 72                  |                        | GUE              | Faro             | 37.098   | -7.922    |
| MALGUE1804    | <i>G. malagensis</i> | KF806327                             | 72                  |                        | GUE              | Faro             | 37.098   | -7.922    |
| MALGUE1805    | <i>G. malagensis</i> | KF806328                             | 72                  |                        | GUE              | Faro             | 37.098   | -7.922    |
| MALGUE1806    | <i>G. malagensis</i> | KF806329                             | 72                  | 25                     | GUE              | Faro             | 37.098   | -7.922    |
| MALGUE1807    | <i>G. malagensis</i> | KF806330                             | 72                  |                        | GUE              | Faro             | 37.098   | -7.922    |
| MALSSa0684    | <i>G. malagensis</i> | KF806359                             | 72                  |                        | SSa              | Sesimbra         | 38.486   | -9.121    |
| MALSSa0497    | <i>G. malagensis</i> | KF806361                             | 72                  |                        | SSa              | Sesimbra         | 38.486   | -9.121    |
| MALARR0977    | <i>G. malagensis</i> | KF806364                             | 72                  |                        | ARR              | Aljezur          | 37.296   | -8.865    |
| MALARR0978    | <i>G. malagensis</i> | KF806365                             | 72                  |                        | ARR              | Aljezur          | 37.296   | -8.865    |
| MALARR0979    | <i>G. malagensis</i> | KF806366                             | 72                  |                        | ARR              | Aljezur          | 37.296   | -8.865    |
| MALARR0980    | <i>G. malagensis</i> | KF806367                             | 72                  |                        | ARR              | Aljezur          | 37.296   | -8.865    |
| MALARR0981    | <i>G. malagensis</i> | KF806368                             | 72                  |                        | ARR              | Aljezur          | 37.296   | -8.865    |
| MALARR0982    | <i>G. malagensis</i> | KF806369                             | 72                  |                        | ARR              | Aljezur          | 37.296   | -8.865    |
| MALARR0983    | <i>G. malagensis</i> | KF806370                             | 72                  |                        | ARR              | Aljezur          | 37.296   | -8.865    |
| MALARR0984    | <i>G. malagensis</i> | KF806371                             | 72                  |                        | ARR              | Aljezur          | 37.296   | -8.865    |
| MALARR0985    | <i>G. malagensis</i> | KF806372                             | 72                  |                        | ARR              | Aljezur          | 37.296   | -8.865    |
| MALGlb0605    | <i>G. malagensis</i> | KF806331                             | 73                  |                        | Glb              | Gibraltar        | 36.118   | -5.345    |
| MALGla0511    | <i>G. malagensis</i> | KF806334                             | 73                  |                        | Gla              | Gibraltar        | 36.131   | -5.351    |
| MALGla0514    | <i>G. malagensis</i> | KF806337                             | 73                  | 5                      | Gla              | Gibraltar        | 36.131   | -5.351    |
| MALGla0515    | <i>G. malagensis</i> | KF806338                             | 73                  |                        | Gla              | Gibraltar        | 36.131   | -5.351    |
| MALGla0524    | <i>G. malagensis</i> | KF806346                             | 73                  |                        | Gla              | Gibraltar        | 36.131   | -5.351    |
| MALGlb0606    | <i>G. malagensis</i> | KF806332                             | 74                  | 1                      | Glb              | Gibraltar        | 36.118   | -5.345    |
| MALGla0513    | <i>G. malagensis</i> | KF806336                             | 75                  | 1                      | Gla              | Gibraltar        | 36.131   | -5.351    |
| MALGla0516    | <i>G. malagensis</i> | KF806339                             | 76                  |                        | Gla              | Gibraltar        | 36.131   | -5.351    |
| MALGla0519    | <i>G. malagensis</i> | KF806342                             | 76                  | 2                      | Gla              | Gibraltar        | 36.131   | -5.351    |
| MALGla0522    | <i>G. malagensis</i> | KF806344                             | 77                  |                        | Gla              | Gibraltar        | 36.131   | -5.351    |
| MALGla0602    | <i>G. malagensis</i> | KF806348                             | 77                  | 2                      | Gla              | Gibraltar        | 36.131   | -5.351    |
| MALSSa0231    | <i>G. malagensis</i> | KF806360                             | 78                  | 1                      | SSa              | Sesimbra         | 38.486   | -9.121    |
| OLIT0a1151    | <i>G. oliveirae</i>  | KF806373                             | 79                  |                        | TOa              | Montes de Toledo | 39.563   | -4.585    |
| OLIT0a1177    | <i>G. oliveirae</i>  | KF806376                             | 79                  | 4                      | TOa              | Montes de Toledo | 39.563   | -4.585    |
| OLIT0a1178    | <i>G. oliveirae</i>  | KF806377                             | 79                  |                        | TOa              | Montes de Toledo | 39.563   | -4.585    |
| OLIT0a1179    | <i>G. oliveirae</i>  | KF806378                             | 79                  |                        | TOa              | Montes de Toledo | 39.563   | -4.585    |
| OLIT0a1164    | <i>G. oliveirae</i>  | KF806374                             | 80                  | 1                      | TOa              | Montes de Toledo | 39.563   | -4.585    |
| OLIT0a1165    | <i>G. oliveirae</i>  | KF806375                             | 81                  |                        | TOa              | Montes de Toledo | 39.563   | -4.585    |
| OLIT0a1475    | <i>G. oliveirae</i>  | KF806383                             | 81                  | 3                      | TOa              | Montes de Toledo | 39.563   | -4.585    |
| OLIT0a0421    | <i>G. oliveirae</i>  | KF806385                             | 81                  |                        | TOa              | Montes de Toledo | 39.563   | -4.585    |
| OLIT0a1180    | <i>G. oliveirae</i>  | KF806379                             | 82                  | 1                      | TOa              | Montes de Toledo | 39.563   | -4.585    |
| OLIT0a1181    | <i>G. oliveirae</i>  | KF806380                             | 83                  | 1                      | TOa              | Montes de Toledo | 39.563   | -4.585    |
| OLIT0a1182    | <i>G. oliveirae</i>  | KF806381                             | 84                  |                        | TOa              | Montes de Toledo | 39.563   | -4.585    |
| OLIT0a1808    | <i>G. oliveirae</i>  | KF806384                             | 84                  | 2                      | TOa              | Montes de Toledo | 39.563   | -4.585    |
| OLIT0a1280    | <i>G. oliveirae</i>  | KF806382                             | 85                  | 1                      | TOa              | Montes de Toledo | 39.563   | -4.585    |
| OLIT0b1118    | <i>G. oliveirae</i>  | KF806386                             | 86                  |                        | TOb              | Montes de Toledo | 39.585   | -4.527    |
| OLIT0b1119    | <i>G. oliveirae</i>  | KF806387                             | 86                  | 3                      | TOb              | Montes de Toledo | 39.585   | -4.527    |
| OLIT0b1121    | <i>G. oliveirae</i>  | KF806389                             | 86                  |                        | TOb              | Montes de Toledo | 39.585   | -4.527    |
| OLIT0b1120    | <i>G. oliveirae</i>  | KF806388                             | 87                  |                        | TOb              | Montes de Toledo | 39.585   | -4.527    |
| OLIT0b1124    | <i>G. oliveirae</i>  | KF806392                             | 87                  |                        | TOb              | Montes de Toledo | 39.585   | -4.527    |
| OLIT0b1126    | <i>G. oliveirae</i>  | KF806394                             | 87                  | 5                      | TOb              | Montes de Toledo | 39.585   | -4.527    |
| OLIT0b1128    | <i>G. oliveirae</i>  | KF806396                             | 87                  |                        | TOb              | Montes de Toledo | 39.585   | -4.527    |
| OLIT0b1129    | <i>G. oliveirae</i>  | KF806397                             | 87                  |                        | TOb              | Montes de Toledo | 39.585   | -4.527    |
| OLIT0b1122    | <i>G. oliveirae</i>  | KF806390                             | 88                  | 1                      | TOb              | Montes de Toledo | 39.585   | -4.527    |
| OLIT0b1123    | <i>G. oliveirae</i>  | KF806391                             | 89                  | 1                      | TOb              | Montes de Toledo | 39.585   | -4.527    |
| OLIT0b1125    | <i>G. oliveirae</i>  | KF806393                             | 90                  | 1                      | TOb              | Montes de Toledo | 39.585   | -4.527    |
| OLIT0b1127    | <i>G. oliveirae</i>  | KF806395                             | 91                  | 1                      | TOb              | Montes de Toledo | 39.585   | -4.527    |

| Collection ID | Species            | COI Genebank      | Haplotype number | Number of sequences | Location Code | Region                    | Latitude | Longitude |
|---------------|--------------------|-------------------|------------------|---------------------|---------------|---------------------------|----------|-----------|
|               |                    | Accession Numbers |                  |                     |               |                           |          |           |
| OLITOb1130    | <i>G.oliveirae</i> | KF806398          | 92               | 1                   | TOb           | Montes de Toledo          | 39.585   | -4.527    |
| OLITOb1131    | <i>G.oliveirae</i> | KF806399          | 93               | 1                   | TOb           | Montes de Toledo          | 39.585   | -4.527    |
| OLITOb0488    | <i>G.oliveirae</i> | KF806400          | 94               | 1                   | TOb           | Montes de Toledo          | 39.585   | -4.527    |
| OLIGRa1762    | <i>G.oliveirae</i> | KF806401          | 95               |                     | GRa           | Sierra de Gredos          | 40.322   | -5.014    |
| OLIGRa1763    | <i>G.oliveirae</i> | KF806402          | 95               |                     | GRa           | Sierra de Gredos          | 40.322   | -5.014    |
| OLIGRa1802    | <i>G.oliveirae</i> | KF806403          | 95               |                     | GRa           | Sierra de Gredos          | 40.322   | -5.014    |
| OLIGRb1752    | <i>G.oliveirae</i> | KF806406          | 95               |                     | GRb           | Sierra de Gredos          | 40.308   | -5.000    |
| OLIGRb1755    | <i>G.oliveirae</i> | KF806409          | 95               | 10                  | GRb           | Sierra de Gredos          | 40.308   | -5.000    |
| OLIGRb1758    | <i>G.oliveirae</i> | KF806412          | 95               |                     | GRb           | Sierra de Gredos          | 40.308   | -5.000    |
| OLIGRb1759    | <i>G.oliveirae</i> | KF806413          | 95               |                     | GRb           | Sierra de Gredos          | 40.308   | -5.000    |
| OLIGRb1760    | <i>G.oliveirae</i> | KF806414          | 95               |                     | GRb           | Sierra de Gredos          | 40.308   | -5.000    |
| OLIGRb1761    | <i>G.oliveirae</i> | KF806415          | 95               |                     | GRb           | Sierra de Gredos          | 40.308   | -5.000    |
| OLIGRb1764    | <i>G.oliveirae</i> | KF806416          | 95               |                     | GRb           | Sierra de Gredos          | 40.308   | -5.000    |
| OLIGRb1145    | <i>G.oliveirae</i> | KF806404          | 96               | 2                   | GRb           | Sierra de Gredos          | 40.308   | -5.000    |
| OLIGRb1757    | <i>G.oliveirae</i> | KF806411          | 96               |                     | GRb           | Sierra de Gredos          | 40.308   | -5.000    |
| OLIGRb1146    | <i>G.oliveirae</i> | KF806405          | 97               | 1                   | GRb           | Sierra de Gredos          | 40.308   | -5.000    |
| OLIGRb1753    | <i>G.oliveirae</i> | KF806407          | 98               | 1                   | GRb           | Sierra de Gredos          | 40.308   | -5.000    |
| OLIGRb1754    | <i>G.oliveirae</i> | KF806408          | 99               | 2                   | GRb           | Sierra de Gredos          | 40.308   | -5.000    |
| OLIGRb1756    | <i>G.oliveirae</i> | KF806410          | 99               |                     | GRb           | Sierra de Gredos          | 40.308   | -5.000    |
| OLIGRc1775    | <i>G.oliveirae</i> | KF806417          | 100              | 1                   | GRc           | Sierra de Gredos          | 40.308   | -5.000    |
| OLILPa0420    | <i>G.oliveirae</i> | KF806418          | 101              | 2                   | LPa           | Sierra de Guadalupe       | 39.440   | -5.315    |
| OLILPa0490    | <i>G.oliveirae</i> | KF806419          | 101              |                     | LPa           | Sierra de Guadalupe       | 39.440   | -5.315    |
| OLILPb1778    | <i>G.oliveirae</i> | KF806420          | 102              | 1                   | LPb           | Sierra de Guadalupe       | 39.474   | -5.368    |
| OLILPb1779    | <i>G.oliveirae</i> | KF806421          | 103              |                     | LPb           | Sierra de Guadalupe       | 39.474   | -5.368    |
| OLILPb1781    | <i>G.oliveirae</i> | KF806423          | 103              |                     | LPb           | Sierra de Guadalupe       | 39.474   | -5.368    |
| OLILPb1795    | <i>G.oliveirae</i> | KF806424          | 103              |                     | LPb           | Sierra de Guadalupe       | 39.474   | -5.368    |
| OLILPb0370    | <i>G.oliveirae</i> | KF806425          | 103              |                     | LPb           | Sierra de Guadalupe       | 39.474   | -5.368    |
| OLILPb0371    | <i>G.oliveirae</i> | KF806426          | 103              | 10                  | LPb           | Sierra de Guadalupe       | 39.474   | -5.368    |
| OLILPb0378    | <i>G.oliveirae</i> | KF806430          | 103              |                     | LPb           | Sierra de Guadalupe       | 39.474   | -5.368    |
| OLILPb0379    | <i>G.oliveirae</i> | KF806431          | 103              |                     | LPb           | Sierra de Guadalupe       | 39.474   | -5.368    |
| OLILPb0380    | <i>G.oliveirae</i> | KF806432          | 103              |                     | LPb           | Sierra de Guadalupe       | 39.474   | -5.368    |
| OLILPb0400    | <i>G.oliveirae</i> | KF806433          | 103              |                     | LPb           | Sierra de Guadalupe       | 39.474   | -5.368    |
| OLILPb0489    | <i>G.oliveirae</i> | KF806434          | 103              |                     | LPb           | Sierra de Guadalupe       | 39.474   | -5.368    |
| OLILPb1780    | <i>G.oliveirae</i> | KF806422          | 104              | 1                   | LPb           | Sierra de Guadalupe       | 39.474   | -5.368    |
| OLILPb0372    | <i>G.oliveirae</i> | KF806427          | 105              | 1                   | LPb           | Sierra de Guadalupe       | 39.474   | -5.368    |
| OLILPb0373    | <i>G.oliveirae</i> | KF806428          | 106              | 1                   | LPb           | Sierra de Guadalupe       | 39.474   | -5.368    |
| OLILPb0375    | <i>G.oliveirae</i> | KF806429          | 107              | 1                   | LPb           | Sierra de Guadalupe       | 39.474   | -5.368    |
| OLIPeA1766    | <i>G.oliveirae</i> | KF806435          | 108              |                     | PEa           | Sierra de Peña de Francia | 40.514   | -6.157    |
| OLIPeB1771    | <i>G.oliveirae</i> | KF806436          | 108              | 3                   | PEb           | Sierra de Peña de Francia | 40.514   | -6.157    |
| OLIPeA0382    | <i>G.oliveirae</i> | KF806437          | 108              |                     | PEa           | Sierra de Peña de Francia | 40.514   | -6.157    |
| OLISEa0422    | <i>G.oliveirae</i> | KF806438          | 109              | 1                   | SEa           | Serra da Estrela          | 40.461   | -7.587    |
| OLISEb1279    | <i>G.oliveirae</i> | KF806439          | 110              | 1                   | SEb           | Serra da Estrela          | 40.414   | -7.587    |

**Supplementary Table S4.** List of species and GenBank accession numbers of available COI sequences from all Iberian endemic and non-endemic *Arion* species, other Arionidae genera, and from the outgroup used in the analyses.

| <b>Endemic Species</b>         | <b>GenBank Accession Number</b> |
|--------------------------------|---------------------------------|
| <i>Arion nobrei</i>            | JQ041667                        |
| <i>Arion gilvus</i>            | KF305200                        |
| <i>Arion urbiae</i>            | AY987919                        |
| <i>Arion baeticus</i>          | AY987871                        |
| <i>Arion paularensis</i>       | AY987899                        |
| <i>Arion wiktori</i>           | AY987921                        |
| <i>Arion molinae</i>           | AY987896                        |
| <i>Arion ponsi</i>             | KF305213                        |
| <i>Arion lizarrustii</i>       | AY987893                        |
| <i>Arion iratii</i>            | AY987892                        |
| <i>Arion flagellus</i>         | AY987882                        |
| <i>Arion fuliginus</i>         | -                               |
| <i>Arion fagophilus</i>        | -                               |
| <i>Arion anthracius</i>        | -                               |
| <i>Arion magnus</i>            | -                               |
| <i>Arion hispanicus</i>        | -                               |
| <i>Arion luisae</i>            | -                               |
| <b>Non-Endemic Species</b>     | <b>GenBank Accession Number</b> |
| <i>Arion alpinus</i>           | AY987867                        |
| <i>Arion ater</i>              | KX834786                        |
| <i>Arion circumscriptus</i>    | AY987873                        |
| <i>Arion distinctus</i>        | AY987874                        |
| <i>Arion fasciatus</i>         | AY987877                        |
| <i>Arion fuscus</i>            | AY987885                        |
| <i>Arion hortensis</i>         | AY987888                        |
| <i>Arion intermedius</i>       | AY987891                        |
| <i>Arion lusitanicus</i>       | EF520642                        |
| <i>Arion occultus</i>          | FJ348255                        |
| <i>Arion owenii</i>            | AY987897                        |
| <i>Arion rufus</i>             | AY987901                        |
| <i>Arion silvaticus</i>        | AY987917                        |
| <i>Arion subfuscus</i>         | AY987904                        |
| <i>Arion vulgaris</i>          | KX834811                        |
| <b>Other Arionidae species</b> | <b>GenBank Accession Number</b> |
| <i>Kootenaia burkei</i>        | AY382636                        |
| <i>Hemphillia glandulosa</i>   | AY382630                        |
| <i>Hemphillia dromedarius</i>  | AY382631                        |
| <i>Prophyaon andersoni</i>     | KM612059                        |
| <i>Hemphillia camelus</i>      | AY382632                        |
| <b>Outgroup</b>                | <b>GenBank Accession Number</b> |
| <i>Lehmanna valentiana</i>     | JX117876                        |
| <i>Limax flavus</i>            | FJ606457                        |

**Supplementary Table S5.** Collection ID, species name, accession number, sequence number, number of sequences (18S rRNA), location code, region, latitude and longitude for *Geomalacus* specimens.

| Collection ID | Species               | 18S Genebank<br>Accession<br>Numbers | Sequence<br>number | Number of<br>sequences | Location<br>Code | Region                    | Latitude | Longitude |
|---------------|-----------------------|--------------------------------------|--------------------|------------------------|------------------|---------------------------|----------|-----------|
| OLIGRb1145    | <i>G. oliveirae</i>   | KF953734                             | 1                  |                        | GRb              | Sierra de Gredos          | 40.308   | -5.000    |
| OLIGRb1146    | <i>G. oliveirae</i>   | KF953735                             | 1                  |                        | GRb              | Sierra de Gredos          | 40.308   | -5.000    |
| OLIGRb1752    | <i>G. oliveirae</i>   | KF953736                             | 1                  |                        | GRb              | Sierra de Gredos          | 40.308   | -5.000    |
| OLIGRb1753    | <i>G. oliveirae</i>   | KF953737                             | 1                  |                        | GRb              | Sierra de Gredos          | 40.308   | -5.000    |
| OLIGRb1754    | <i>G. oliveirae</i>   | KF953738                             | 1                  |                        | GRb              | Sierra de Gredos          | 40.308   | -5.000    |
| OLIGRb1756    | <i>G. oliveirae</i>   | KF953739                             | 1                  |                        | GRb              | Sierra de Gredos          | 40.308   | -5.000    |
| OLIGRc1775    | <i>G. oliveirae</i>   | KF953740                             | 1                  |                        | GRc              | Sierra de Gredos          | 40.308   | -5.000    |
| OLILPa0420    | <i>G. oliveirae</i>   | KF953741                             | 1                  |                        | LPa              | Sierra de Guadalupe       | 39.440   | -5.315    |
| OLILPb0371    | <i>G. oliveirae</i>   | KF953744                             | 1                  |                        | LPb              | Sierra de Guadalupe       | 39.474   | -5.368    |
| OLILPb0372    | <i>G. oliveirae</i>   | KF953745                             | 1                  |                        | LPb              | Sierra de Guadalupe       | 39.474   | -5.368    |
| OLILPb0373    | <i>G. oliveirae</i>   | KF953746                             | 1                  |                        | LPb              | Sierra de Guadalupe       | 39.474   | -5.368    |
| OLILPb0375    | <i>G. oliveirae</i>   | KF953747                             | 1                  |                        | LPb              | Sierra de Guadalupe       | 39.474   | -5.368    |
| OLILPb1779    | <i>G. oliveirae</i>   | KF953742                             | 1                  | 25                     | LPb              | Sierra de Guadalupe       | 39.474   | -5.368    |
| OLILPb1780    | <i>G. oliveirae</i>   | KF953743                             | 1                  |                        | LPb              | Sierra de Guadalupe       | 39.474   | -5.368    |
| OLIPeA1766    | <i>G. oliveirae</i>   | KF953748                             | 1                  |                        | PEa              | Sierra de Peña de Francia | 40.514   | -6.157    |
| OLISEa0422    | <i>G. oliveirae</i>   | KF953749                             | 1                  |                        | SEa              | Serra da Estrela          | 40.461   | -7.587    |
| OLITOb0488    | <i>G. oliveirae</i>   | KF953733                             | 1                  |                        | TOb              | Montes de Toledo          | 39.585   | -4.527    |
| OLITOb1119    | <i>G. oliveirae</i>   | KF953725                             | 1                  |                        | TOb              | Montes de Toledo          | 39.585   | -4.527    |
| OLITOb1120    | <i>G. oliveirae</i>   | KF953726                             | 1                  |                        | TOb              | Montes de Toledo          | 39.585   | -4.527    |
| OLITOb1122    | <i>G. oliveirae</i>   | KF953727                             | 1                  |                        | TOb              | Montes de Toledo          | 39.585   | -4.527    |
| OLITOb1123    | <i>G. oliveirae</i>   | KF953728                             | 1                  |                        | TOb              | Montes de Toledo          | 39.585   | -4.527    |
| OLITOb1125    | <i>G. oliveirae</i>   | KF953729                             | 1                  |                        | TOb              | Montes de Toledo          | 39.585   | -4.527    |
| OLITOb1127    | <i>G. oliveirae</i>   | KF953730                             | 1                  |                        | TOb              | Montes de Toledo          | 39.585   | -4.527    |
| OLITOb1130    | <i>G. oliveirae</i>   | KF953731                             | 1                  |                        | TOb              | Montes de Toledo          | 39.585   | -4.527    |
| OLITOb1131    | <i>G. oliveirae</i>   | KF953732                             | 1                  |                        | TOb              | Montes de Toledo          | 39.585   | -4.527    |
| ANGMOa0147    | <i>G. anguiformis</i> | KF953750                             | 2                  |                        | MOa              | Monchique                 | 37.307   | -8.570    |
| ANGMOb0261    | <i>G. anguiformis</i> | KF953751                             | 2                  |                        | MOb              | Monchique                 | 37.305   | -8.588    |
| ANGMOd0340    | <i>G. anguiformis</i> | KF953752                             | 2                  |                        | MOd              | Monchique                 | 37.342   | -8.488    |
| ANGMOe0505    | <i>G. anguiformis</i> | KF953756                             | 2                  |                        | MOe              | Monchique                 | 37.313   | -8.549    |
| ANGMOe0529    | <i>G. anguiformis</i> | KF953754                             | 2                  |                        | MOe              | Monchique                 | 37.313   | -8.549    |
| ANGMOe0532    | <i>G. anguiformis</i> | KF953753                             | 2                  |                        | MOe              | Monchique                 | 37.313   | -8.549    |
| ANGMOe1149    | <i>G. anguiformis</i> | KF953755                             | 2                  |                        | MOe              | Monchique                 | 37.313   | -8.549    |
| ANGMOf0548    | <i>G. anguiformis</i> | KF953759                             | 2                  |                        | MOf              | Monchique                 | 37.306   | -8.499    |
| ANGMOf0549    | <i>G. anguiformis</i> | KF953761                             | 2                  | 17                     | MOf              | Monchique                 | 37.306   | -8.499    |
| ANGMOf0552    | <i>G. anguiformis</i> | KF953758                             | 2                  |                        | MOf              | Monchique                 | 37.306   | -8.499    |
| ANGMOf0554    | <i>G. anguiformis</i> | KF953760                             | 2                  |                        | MOf              | Monchique                 | 37.306   | -8.499    |
| ANGMOf0560    | <i>G. anguiformis</i> | KF953757                             | 2                  |                        | MOf              | Monchique                 | 37.306   | -8.499    |
| ANGSBb1154    | <i>G. anguiformis</i> | KF953762                             | 2                  |                        | SBb              | Faro                      | 37.273   | -7.875    |
| ANGSBb1172    | <i>G. anguiformis</i> | KF953763                             | 2                  |                        | SBb              | Faro                      | 37.273   | -7.875    |
| ARAARA0525    | <i>G. anguiformis</i> | KF953766                             | 2                  |                        | ARA              | Aracena                   | 37.878   | -6.817    |
| ARAARA0535    | <i>G. anguiformis</i> | KF953764                             | 2                  |                        | ARA              | Aracena                   | 37.878   | -6.817    |
| ARAARA0547    | <i>G. anguiformis</i> | KF953765                             | 2                  |                        | ARA              | Aracena                   | 37.878   | -6.817    |
| MACBRA0492    | <i>G. maculosus</i>   | KF953767                             | 3                  |                        | BRA              | Bragança                  | 41.688   | -6.751    |
| MACCAa0922    | <i>G. maculosus</i>   | KF953768                             | 3                  |                        | CAa              | Asturias                  | 42.949   | -6.395    |
| MACCAb0806    | <i>G. maculosus</i>   | KF953769                             | 3                  |                        | CAb              | Asturias                  | 42.955   | -6.372    |
| MACCAM0146    | <i>G. maculosus</i>   | KF953770                             | 3                  |                        | CAM              | Serra da Estrela          | 40.383   | -7.544    |
| MACCAM1880    | <i>G. maculosus</i>   | KF953771                             | 3                  |                        | CAM              | Serra da Estrela          | 40.383   | -7.544    |
| MACCOa0868    | <i>G. maculosus</i>   | KF953772                             | 3                  |                        | Coa              | Cantabria                 | 43.307   | -5.053    |
| MACCOb1116    | <i>G. maculosus</i>   | KF953773                             | 3                  |                        | COb              | Cantabria                 | 43.307   | -5.053    |
| MACCOM0841    | <i>G. maculosus</i>   | KF953786                             | 3                  |                        | COM              | Coruña                    | 42.878   | -8.555    |
| MACCOM0842    | <i>G. maculosus</i>   | KF953787                             | 3                  |                        | COM              | Coruña                    | 42.878   | -8.555    |
| MACGEf0820    | <i>G. maculosus</i>   | KF953775                             | 3                  |                        | GEf              | Geres                     | 41.793   | -8.138    |
| MACGUA0230    | <i>G. maculosus</i>   | KF953774                             | 3                  |                        | GUA              | Serra da Estrela          | 40.535   | -7.273    |
| MACHOb0357    | <i>G. maculosus</i>   | KF953778                             | 3                  |                        | HOb              | Geres                     | 41.834   | -8.119    |
| MACHOb0932    | <i>G. maculosus</i>   | KF953779                             | 3                  | 25                     | HOb              | Geres                     | 41.834   | -8.119    |
| MACMAN1231    | <i>G. maculosus</i>   | KF953776                             | 3                  |                        | MAN              | Ourense                   | 42.310   | -7.237    |
| MACMAN1240    | <i>G. maculosus</i>   | KF953777                             | 3                  |                        | MAN              | Ourense                   | 42.310   | -7.237    |
| MACMAR0762    | <i>G. maculosus</i>   | KF953788                             | 3                  |                        | MAR              | Picos de Europa           | 43.388   | -4.110    |
| MACPOR0232    | <i>G. maculosus</i>   | KF953780                             | 3                  |                        | POR              | Viana do Castelo          | 41.705   | -8.792    |
| MACSAA0723    | <i>G. maculosus</i>   | KF953784                             | 3                  |                        | SAA              | Picos de Europa           | 43.238   | -4.227    |
| MACSAA0727    | <i>G. maculosus</i>   | KF953785                             | 3                  |                        | SAA              | Picos de Europa           | 43.238   | -4.227    |
| MACSEb0239    | <i>G. maculosus</i>   | KF953782                             | 3                  |                        | SEb              | Serra da Estrela          | 40.414   | -7.587    |
| MACSEb0243    | <i>G. maculosus</i>   | KF953783                             | 3                  |                        | SEb              | Serra da Estrela          | 40.414   | -7.587    |
| MACSEE0217    | <i>G. maculosus</i>   | KF953781                             | 3                  |                        | SEE              | Viana do Castelo          | 41.774   | -8.619    |
| MACVOa0967    | <i>G. maculosus</i>   | KF953789                             | 3                  |                        | VOa              | Vouzela                   | 40.721   | -8.109    |
| MACVOa0968    | <i>G. maculosus</i>   | KF953790                             | 3                  |                        | VOa              | Vouzela                   | 40.721   | -8.109    |
| MACVOa0970    | <i>G. maculosus</i>   | KF953791                             | 3                  |                        | VOa              | Vouzela                   | 40.721   | -8.109    |
| MALClb1532    | <i>G. malagensis</i>  | KF953799                             | 4                  |                        | Clb              | Gibraltar                 | 37.679   | -6.650    |
| MALGla0510    | <i>G. malagensis</i>  | KF953803                             | 4                  |                        | Gla              | Gibraltar                 | 36.131   | -5.351    |
| MALGla0511    | <i>G. malagensis</i>  | KF953804                             | 4                  |                        | Gla              | Gibraltar                 | 36.131   | -5.351    |
| MALGla0516    | <i>G. malagensis</i>  | KF953805                             | 4                  |                        | Gla              | Gibraltar                 | 36.131   | -5.351    |
| MALGla0517    | <i>G. malagensis</i>  | KF953806                             | 4                  |                        | Gla              | Gibraltar                 | 36.131   | -5.351    |
| MALGla0522    | <i>G. malagensis</i>  | KF953807                             | 4                  | 17                     | Gla              | Gibraltar                 | 36.131   | -5.351    |
| MALGUE1798    | <i>G. malagensis</i>  | KF953802                             | 4                  |                        | GUE              | Faro                      | 37.098   | -7.922    |
| MALJER0563    | <i>G. malagensis</i>  | KF953800                             | 4                  |                        | JER              | Gibraltar                 | 36.255   | -5.582    |
| MALJER0567    | <i>G. malagensis</i>  | KF953801                             | 4                  |                        | JER              | Gibraltar                 | 36.255   | -5.582    |
| MALSSa0159    | <i>G. malagensis</i>  | KF953808                             | 4                  |                        | SSa              | Sesimbra                  | 38.486   | -9.121    |
| MALSSb1843    | <i>G. malagensis</i>  | KF953798                             | 4                  |                        | SSb              | Sesimbra                  | 38.479   | -9.113    |

Box1. Workflow of the methods used to test the different diversity-dependence models to explain the observed differences in clade richness between two genera of Iberian endemic terrestrial slugs.

| Hypotheses                                                                                                                                                                                                                                                                                                                           | Method                                                                                                                                    | Models                                                                                                                                                                                                                                                                                                                                                                                                                                                                    | Result                                                                                                                                 | Conclusion |
|--------------------------------------------------------------------------------------------------------------------------------------------------------------------------------------------------------------------------------------------------------------------------------------------------------------------------------------|-------------------------------------------------------------------------------------------------------------------------------------------|---------------------------------------------------------------------------------------------------------------------------------------------------------------------------------------------------------------------------------------------------------------------------------------------------------------------------------------------------------------------------------------------------------------------------------------------------------------------------|----------------------------------------------------------------------------------------------------------------------------------------|------------|
| <b>H1</b> Differences in clade age                                                                                                                                                                                                                                                                                                   | BEAST dated phylogeny                                                                                                                     | Birth-death incomplete sampling<br>Tree prior                                                                                                                                                                                                                                                                                                                                                                                                                             | No differences in clade age<br>(Figure 2)                                                                                              | No         |
| <b>H2</b> Differences in constant diversification rates                                                                                                                                                                                                                                                                              | make.bd.split [diversitree]<br>[incomplete sampling<br>taxon taken into account]                                                          |                                                                                                                                                                                                                                                                                                                                                                                                                                                                           | Best-fit = model 3 (Table 2).<br>Extinction rates equal to zero in<br>both genera.<br>Equal speciation rates for the two<br>genera.    | No         |
| <b>H3</b> Combination of H1 and H2<br>Differences in clade age and diversification rates                                                                                                                                                                                                                                             |                                                                                                                                           |                                                                                                                                                                                                                                                                                                                                                                                                                                                                           | No differences in clade age or<br>in diversification rates                                                                             | No         |
| How to explain this contradictory result suggesting that neither differences in clade age nor unequal diversification rates explain the existence of a clade-poor and a clade-rich genera? Testing differences on how diversification rates vary over time within each clade.                                                        |                                                                                                                                           |                                                                                                                                                                                                                                                                                                                                                                                                                                                                           |                                                                                                                                        |            |
| <b>H4</b> Differences in variable diversification rates within each clade                                                                                                                                                                                                                                                            | fitdAICrc [laser]<br><br>make.bd.t [diversitree][IST]<br>dd_ML [DDD] [IST]<br><br>[IST = incomplete sampling<br>taxon taken into account] | 1) $\lambda_A$ , 2) $\lambda_G$ ; 3) $\lambda_A, \mu_A$ ; 4) $\lambda_G, \mu_G$ ;<br><b>5) <math>r_{0A}, K_A</math>; 6) <math>r_{0G}, K_G</math>;</b><br>7) $r_{0A}, xp_A$ ; 8) $r_{0G}, xp_G$ ;<br>9) $r_{0A}, r_{1A}$ ; 10) $r_{0G}, r_{1G}$ .<br><br>1) $\lambda_A$ , 2) $\lambda_A, \mu_A$ ; 3) <b><math>r_{0A}, K_A</math>.</b><br>1) $r_{0A}, r_{1A}$ ; 2) $r_{0A}, r_{1A}, k_A$ .                                                                                  | Rate variable models fit the data<br>better than constant rate models in<br>all three sets of models evaluated.<br>(Table 3, 4 and 5). |            |
| If variable models are a better fit to the data genus are taken separately, a more refined diversity-dependent diversification model with decoupling of a subclade's diversification dynamics from the main clade's dynamics can indicate which parameter ( $\lambda$ and/or $K$ ) is responsible for the species number difference. |                                                                                                                                           |                                                                                                                                                                                                                                                                                                                                                                                                                                                                           |                                                                                                                                        |            |
| <b>H5.1</b> $\lambda$ differs between genera (models: 1,2,4,5)<br>(Higher initial speciation rate in <i>Arion</i> )                                                                                                                                                                                                                  | dd_KI_ML[DDD]                                                                                                                             | 1) $r_{0A}, r_{0G}, \mu_A, \mu_G, k_A, k_G$<br>2) $r_{0A}, r_{0G}, \mu_A \approx 0, \mu_G \approx 0, k_A, k_G$<br><b>3) <math>r_{0A} \approx r_{0G}, \mu_A \approx 0, \mu_G \approx 0, k_A, k_G</math></b><br>4) $r_{0A}, r_{0G}, \mu_A \approx 0, \mu_G \approx 0, k_A \approx k_G$<br>5) $r_{0A}, r_{0G}, \mu_A \approx 0, \mu_G \approx 0, k_A \approx 0, k_G \approx 0$<br>6) $r_{0A} \approx r_{0G}, \mu_A \approx 0, \mu_G \approx 0, k_A \approx 0, k_G \approx 0$ | Best-fit = model 3 (Table 6).<br><br>Equal $r_0$ between genus                                                                         | No         |
| <b>H5.2</b> $K$ differs between genera (models: 1,2,3)<br>(Weaker decline of speciation rate in species-rich clade?)                                                                                                                                                                                                                 | [incomplete sampling<br>taxon taken into account]                                                                                         |                                                                                                                                                                                                                                                                                                                                                                                                                                                                           | Different $k$ for each genus                                                                                                           | Yes        |
| <b>H6</b> Combination of H5.1 and H5.2                                                                                                                                                                                                                                                                                               |                                                                                                                                           |                                                                                                                                                                                                                                                                                                                                                                                                                                                                           |                                                                                                                                        | No         |

*A*, *Arion Clade 1*; *G*, *Geomalacus clade*;  $\lambda$ , speciation rate;  $\mu$ , extinction rate when applicable;  $K$ , carrying capacity parameter of DDL and DDD models;  $r_0$  ( $= \lambda_0 - \mu_0$ ), initial net diversification rate for diversity dependent linear (DDL), diversity dependent exponential (DDX), and yule2rate (or constant net diversification rate for pure-birth and birth-death model) models;  $r_1$  = net diversification rate after the first shift at time  $t_1$ ;  $xp$ , exponent of DDX model;  $k$ , parameter of the exponential change in speciation rate for the models SPVAR.

Supplementary Figure S1.

Phylogenetic relationships of *Geomalacus* based on a Bayesian analysis of a combined data set (74 taxa; COI: 594 bp and 18S rRNA: 524 bp). Numbers at the nodes are from top to bottom: Bayesian posterior probabilities (BPP) and bootstrap proportions (BP), respectively. Only values above 50% (BP) and 70% (BPP) are represented.

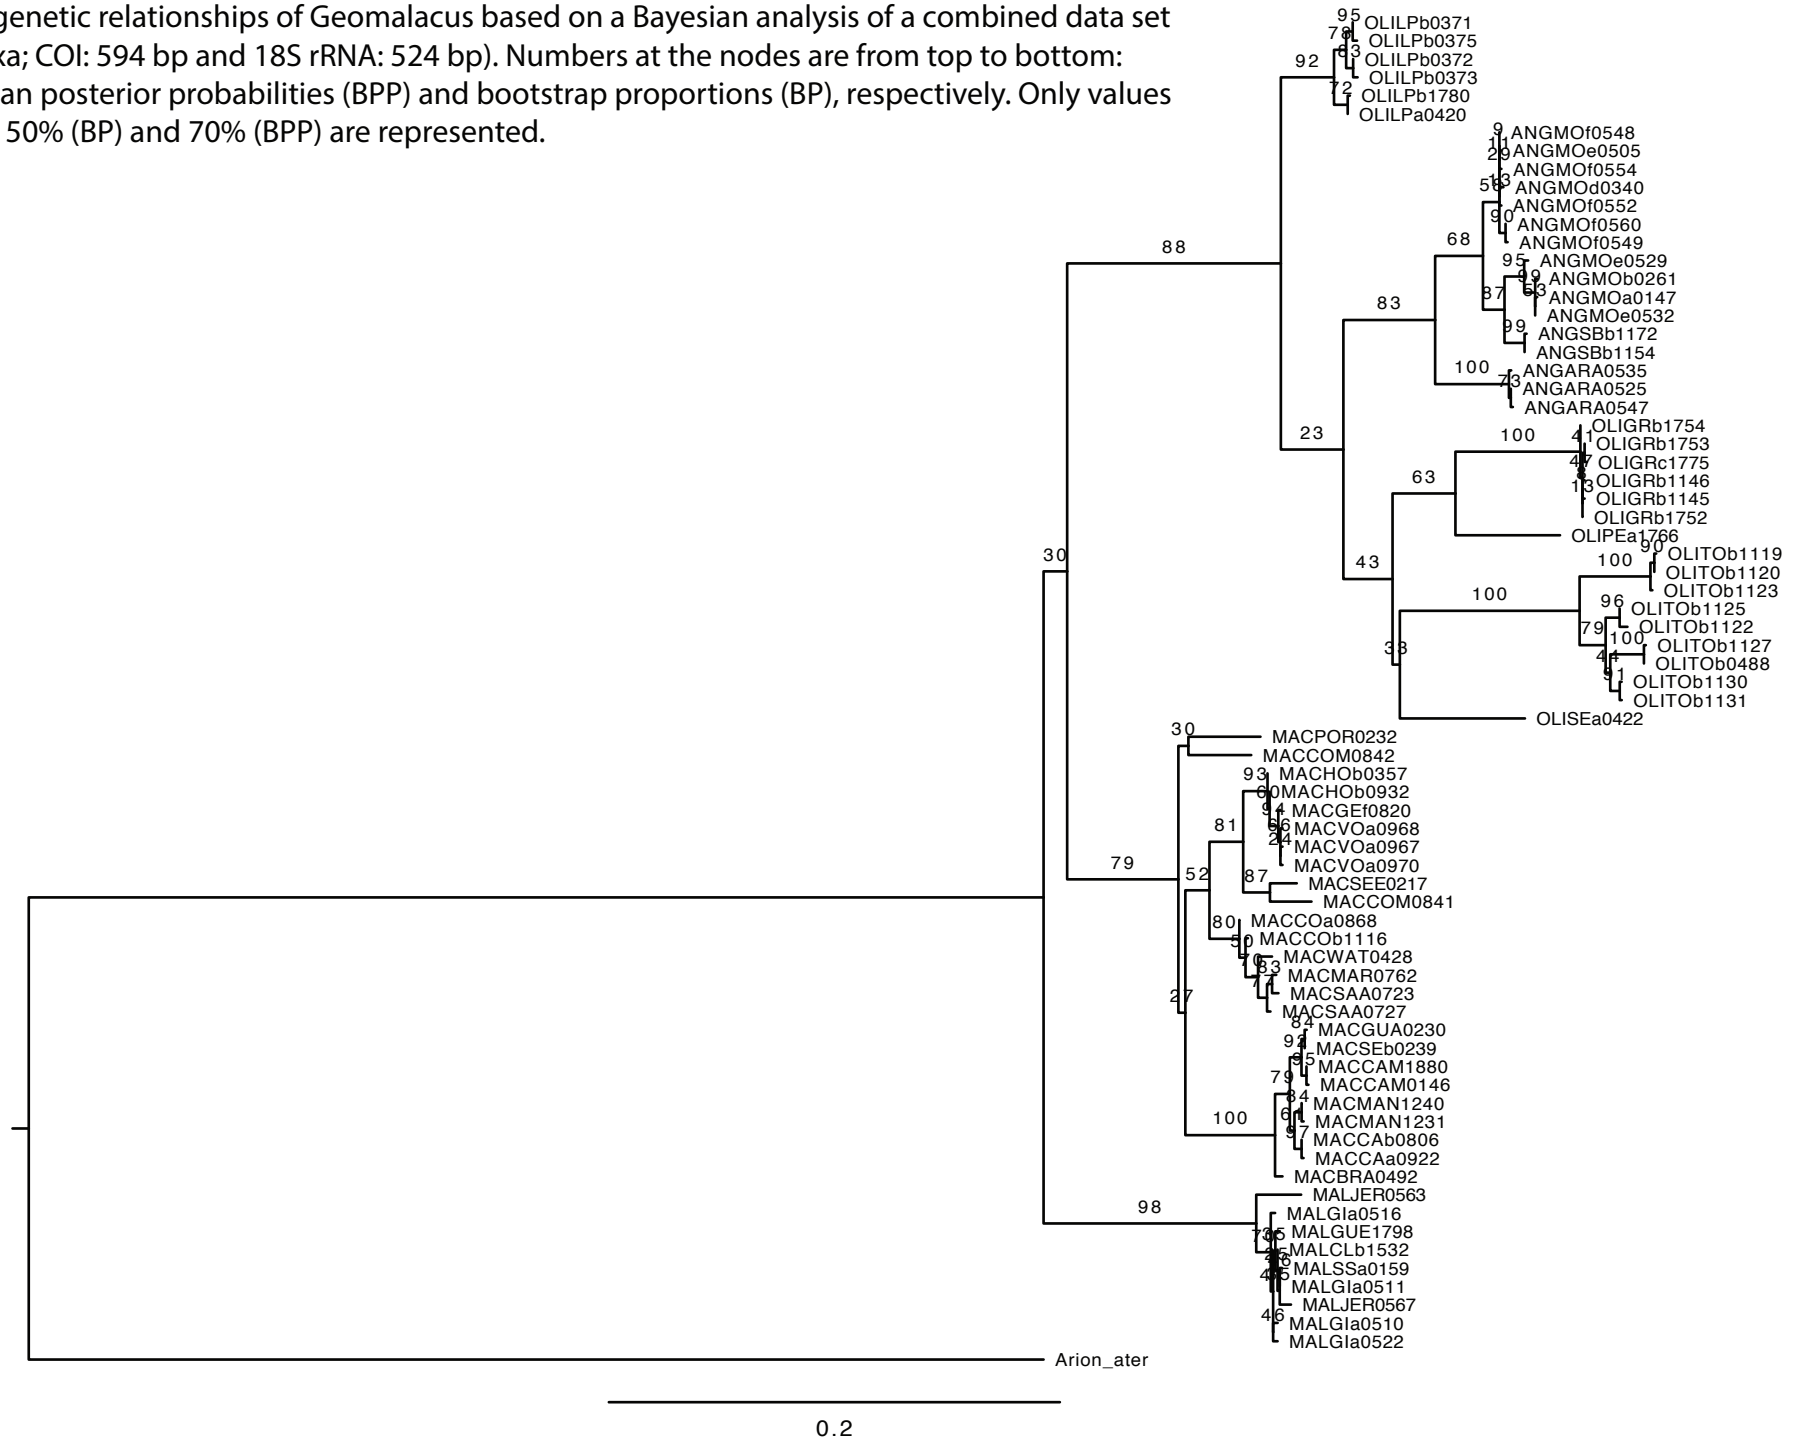

Supplementary Figure S2. Phylogenetic relationships of Arionidae based on a Bayesian analysis of cytochrome oxidase subunit I (42 taxa: 523 bp). Numbers at the nodes are Bayesian posterior probabilities. Only values above 70% (BPP) are represented.

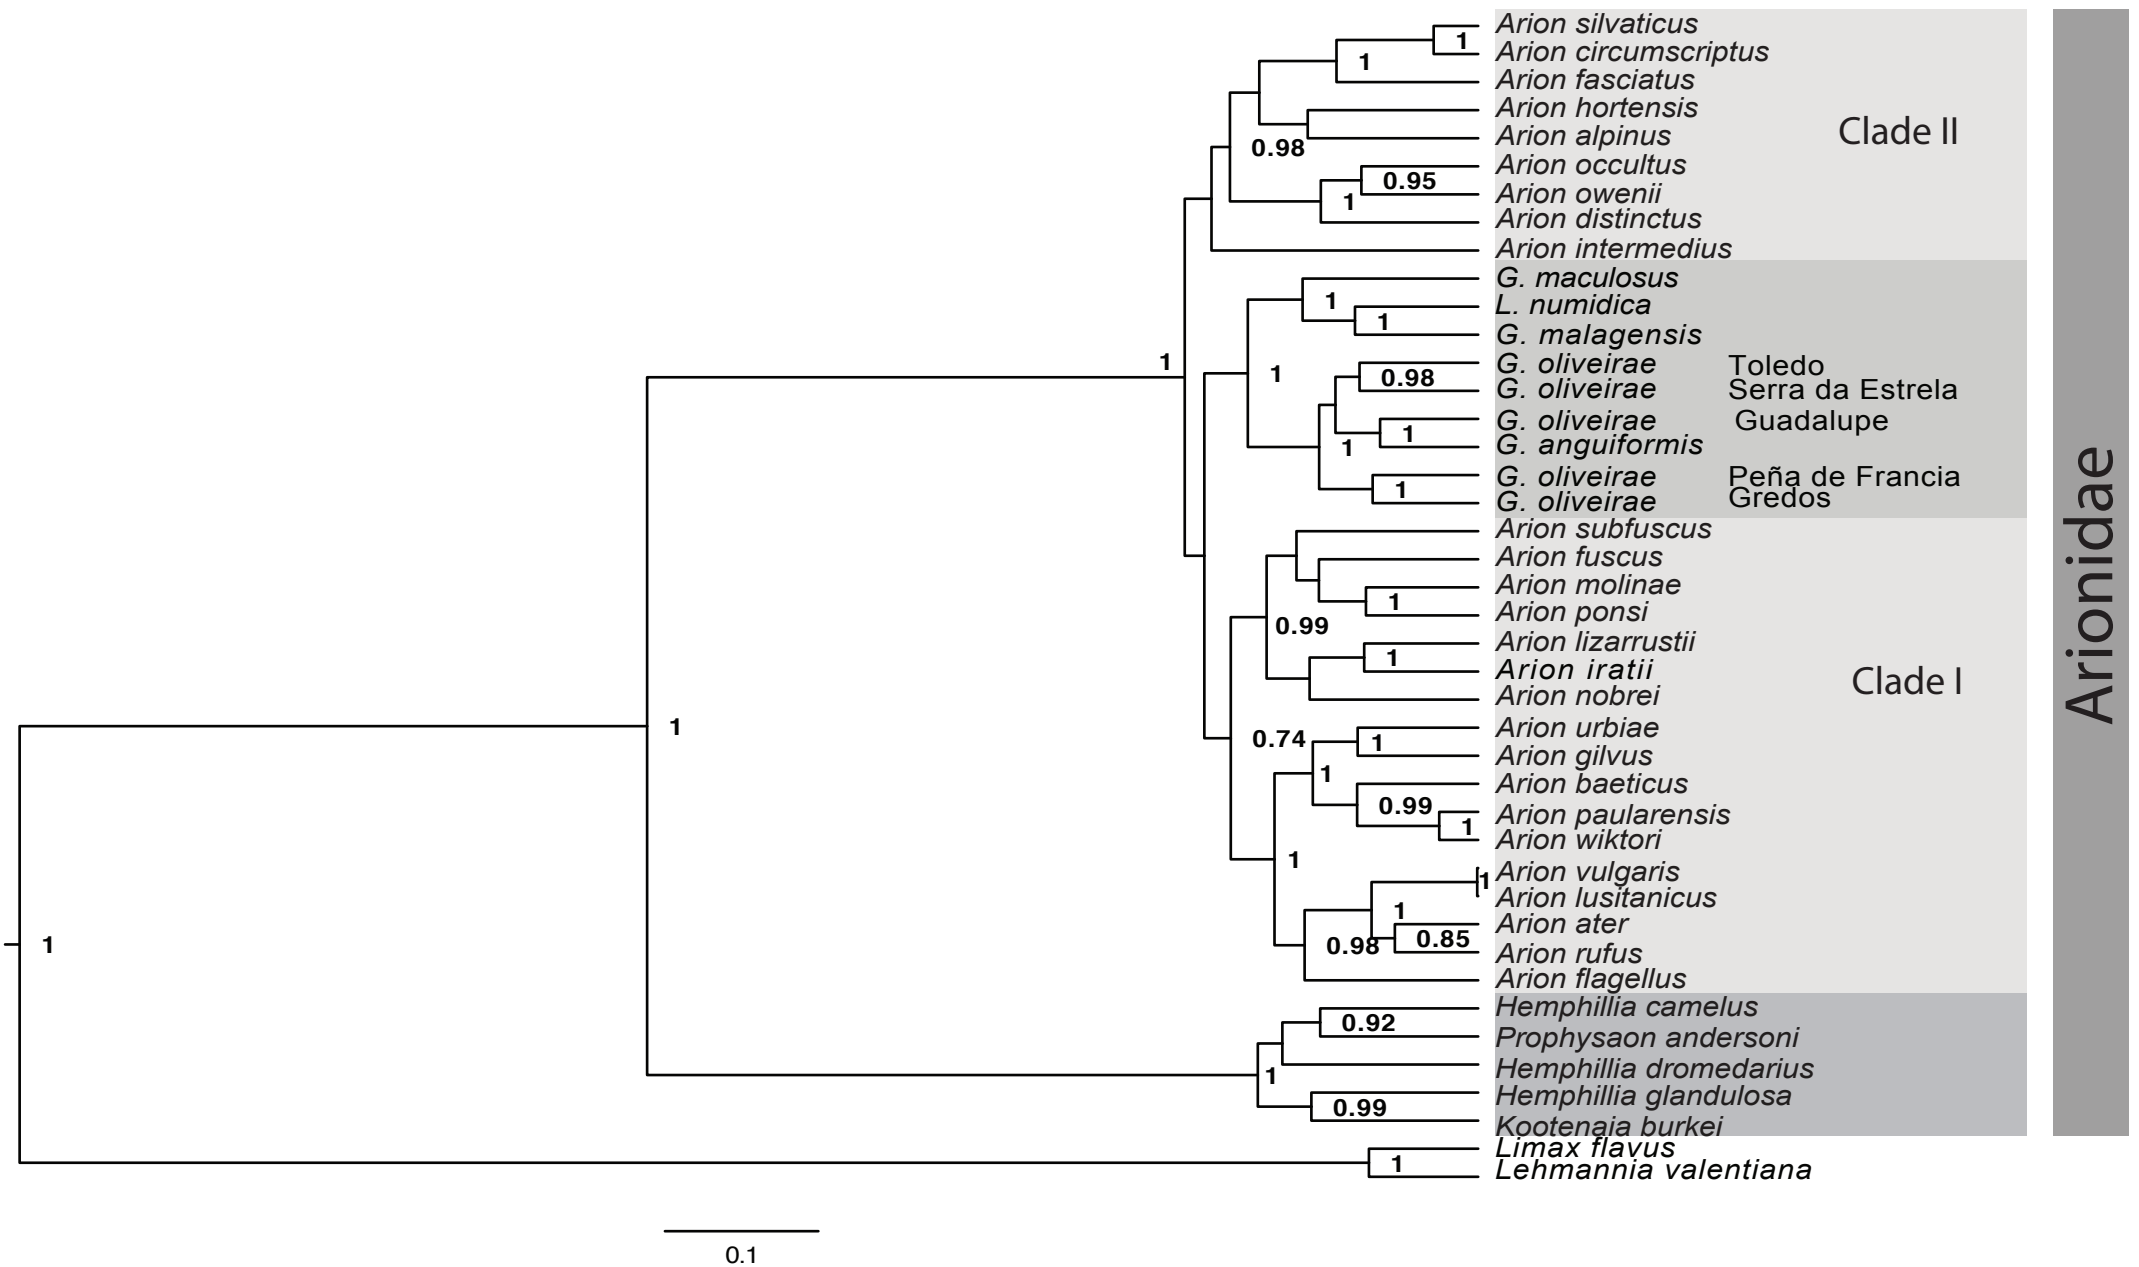

Supplementary Figure S3. BAMM phylorate plot showing diversification rate across *Arion* and *Geomalacus* species, with rates decreasing from red to blue.

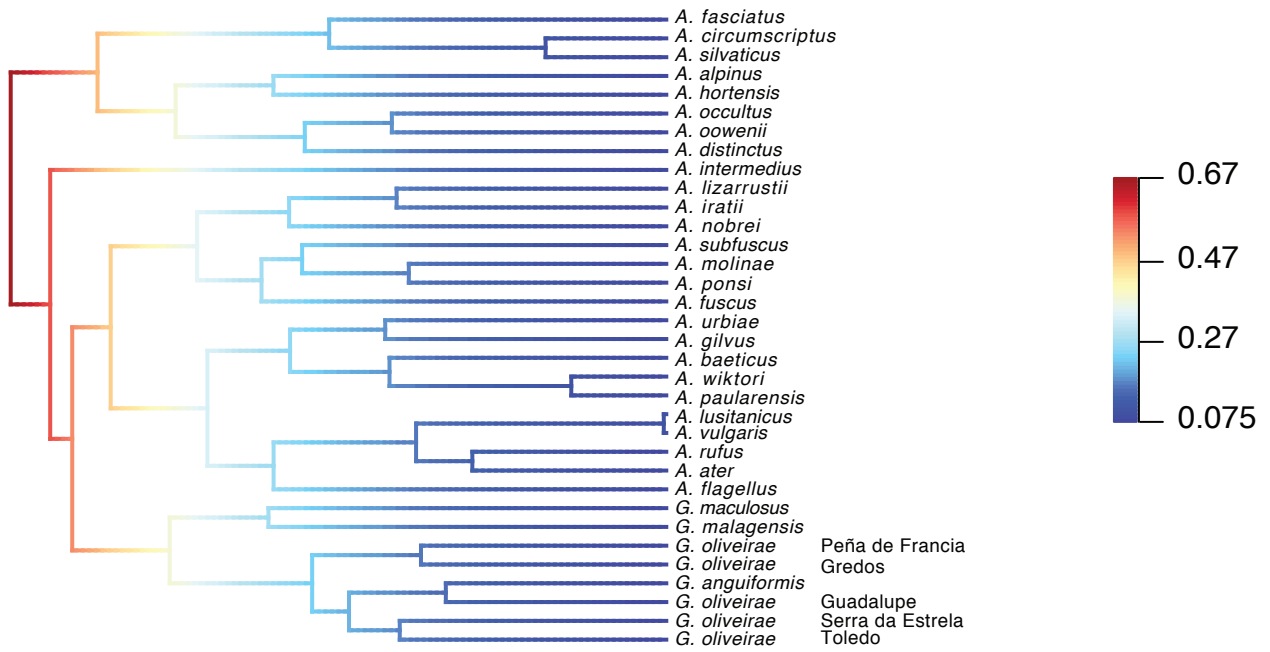

Supplement: 41598_2017_16417_MOESM1_ESM.pdf [file 41598_2017_16417_MOESM1_ESM.pdf]
